# Supplementary material for: Liposomal MRI probes containing encapsulated or amphiphilic Fe( iii ) coordination complexes
Source: Royal Society of Chemistry journal article supplement (doi:10.1039/d3bm00029j), 2023-01-01
Supplement: d3bm00029j1.pdf [file d3bm00029j1.pdf]

Supporting Information:

**Liposomal MRI probes containing encapsulated or amphiphilic Fe(III) coordination complexes**

*Md Saiful I. Chowdhury,<sup>1</sup> Elizabeth A. Kras,<sup>1</sup> Steven G. Turowski,<sup>2</sup> Joseph A. Sperryak<sup>2</sup> and Janet R. Morrow<sup>1\*</sup>*

*[1] Department of Chemistry, University at Buffalo, The State University of New York*

*Amherst, NY 14260, United States*

*[2] Department of Cell Stress Biology, Roswell Park Comprehensive Cancer Center, Buffalo, New York 14263, United States*

| <b>Table of Contents</b>                                                                                                                                        | <b>Page no.</b> |
|-----------------------------------------------------------------------------------------------------------------------------------------------------------------|-----------------|
| Scheme S1. Synthesis of N,N-distaeryl-2-chloro acetamide, TOAL+ H <sup>+</sup> ligand and Fe(III) complex                                                       | 4               |
| Scheme S2. Preparation of TOAB+H <sup>+</sup> ligand and Fe(III) complex                                                                                        | 5               |
| Table S1. Molar absorptivity (M <sup>-1</sup> cm <sup>-1</sup> ) of the complexes at 37 °C                                                                      | 14              |
| Table S2. R <sub>1</sub> and R <sub>2</sub> of liposomes in saline or serum measured over time                                                                  | 15              |
| Table S3. r <sub>1</sub> and r <sub>2</sub> proton relaxivity values based on iron liposome (per-particle) concentration                                        | 15              |
| Table S4 : First order elimination rate constants, volume of distributions and half-lives of LipoA, LipoB and LipoC                                             | 21              |
| Figure S1a. <sup>1</sup> H NMR of N,N-distaeryl-2-chloro acetamide in CDCl <sub>3</sub> ; Figure S1b. <sup>1</sup> H NMR of TOALH ligand in CDCl <sub>3</sub>   | 6               |
| Figure S2a. <sup>13</sup> C NMR of N,N-distaeryl-2-chloro acetamide in CDCl <sub>3</sub> ; Figure S2b. <sup>13</sup> C NMR of TOALH ligand in CDCl <sub>3</sub> | 7               |
| Figure S3. ESI-MS of TOALH ligand                                                                                                                               | 8               |
| Figure S4. ESI-MS of [Fe(TOAL)]Cl <sub>2</sub>                                                                                                                  | 9               |
| Figure S5. ESI-MS of TOABH (483.75). TOAB+Na <sup>+</sup> (505.50).                                                                                             | 10              |
| Figure S6. <sup>1</sup> H NMR of TOABH ligand in DMSO-D <sub>6</sub>                                                                                            | 11              |
| Figure S7. <sup>13</sup> C NMR of TOABH ligand in MeOD.                                                                                                         | 11              |
| Figure S8. ESI-MS of [Fe(TOAB)]Br <sub>2</sub> . M <sup>+</sup> = [Fe(TOAB-H <sup>+</sup> )] <sup>+</sup>                                                       | 12              |
| Figure S9. <sup>1</sup> H Spectrum of [Fe(TOAB)]Br <sub>2</sub> at 15.0 mM (500 MHz, D <sub>2</sub> O, 298K)                                                    | 13              |

|                                                                                                                                                          |       |
|----------------------------------------------------------------------------------------------------------------------------------------------------------|-------|
| Figure S10. UV-Vis absorbance spectra of TOAB-H ligand and [Fe(TOAB)]Br <sub>2</sub>                                                                     | 13    |
| Figure S11. UV-Vis absorbance spectra of 145 μM [Fe(TOAL)]Cl <sub>2</sub> in methanol at 37 °C                                                           | 14    |
| Figure S12. T <sub>1</sub> proton relaxation of micellar Fe(III) complex                                                                                 | 16    |
| Figure S13. Sample r <sub>1</sub> and r <sub>2</sub> proton relaxivities of LipoA, LipoB and LipoC liposomes in aqueous/serum solutions                  | 17    |
| Figure S14. 1/T <sub>1</sub> dependence on temperature for LipoA (top), LipoB (left) and LipoC (right)                                                   | 18    |
| Figure S15. Biodistribution and clearance of LipoA in a healthy BALB/c mouse                                                                             | 19    |
| Figure S16. Biodistribution and clearance of LipoB in a CT26 tumored BALB/c mouse                                                                        | 20    |
| Figure S17. Biodistribution and clearance of LipoC in a CT26 tumored BALB/c mouse                                                                        | 20-21 |
| Figure S18: : Change in T <sub>1</sub> -weighted signal intensity for LipoB and LipoC in CT26 murine tumor over time compared to signal in blood vessel. | 22    |
| Figure S19: AUC graph and elimination rate constants of LipoA, LipoB and LipoC in plasma                                                                 | 22-23 |
| Figures S20a,b,c,d. Dynamic light scattering studies of liposomes and micelle                                                                            | 24-26 |
| Figure S21: The relaxivity of LipoB as a function of the fraction of the contrast agent inside the liposomal core.                                       | 27-28 |

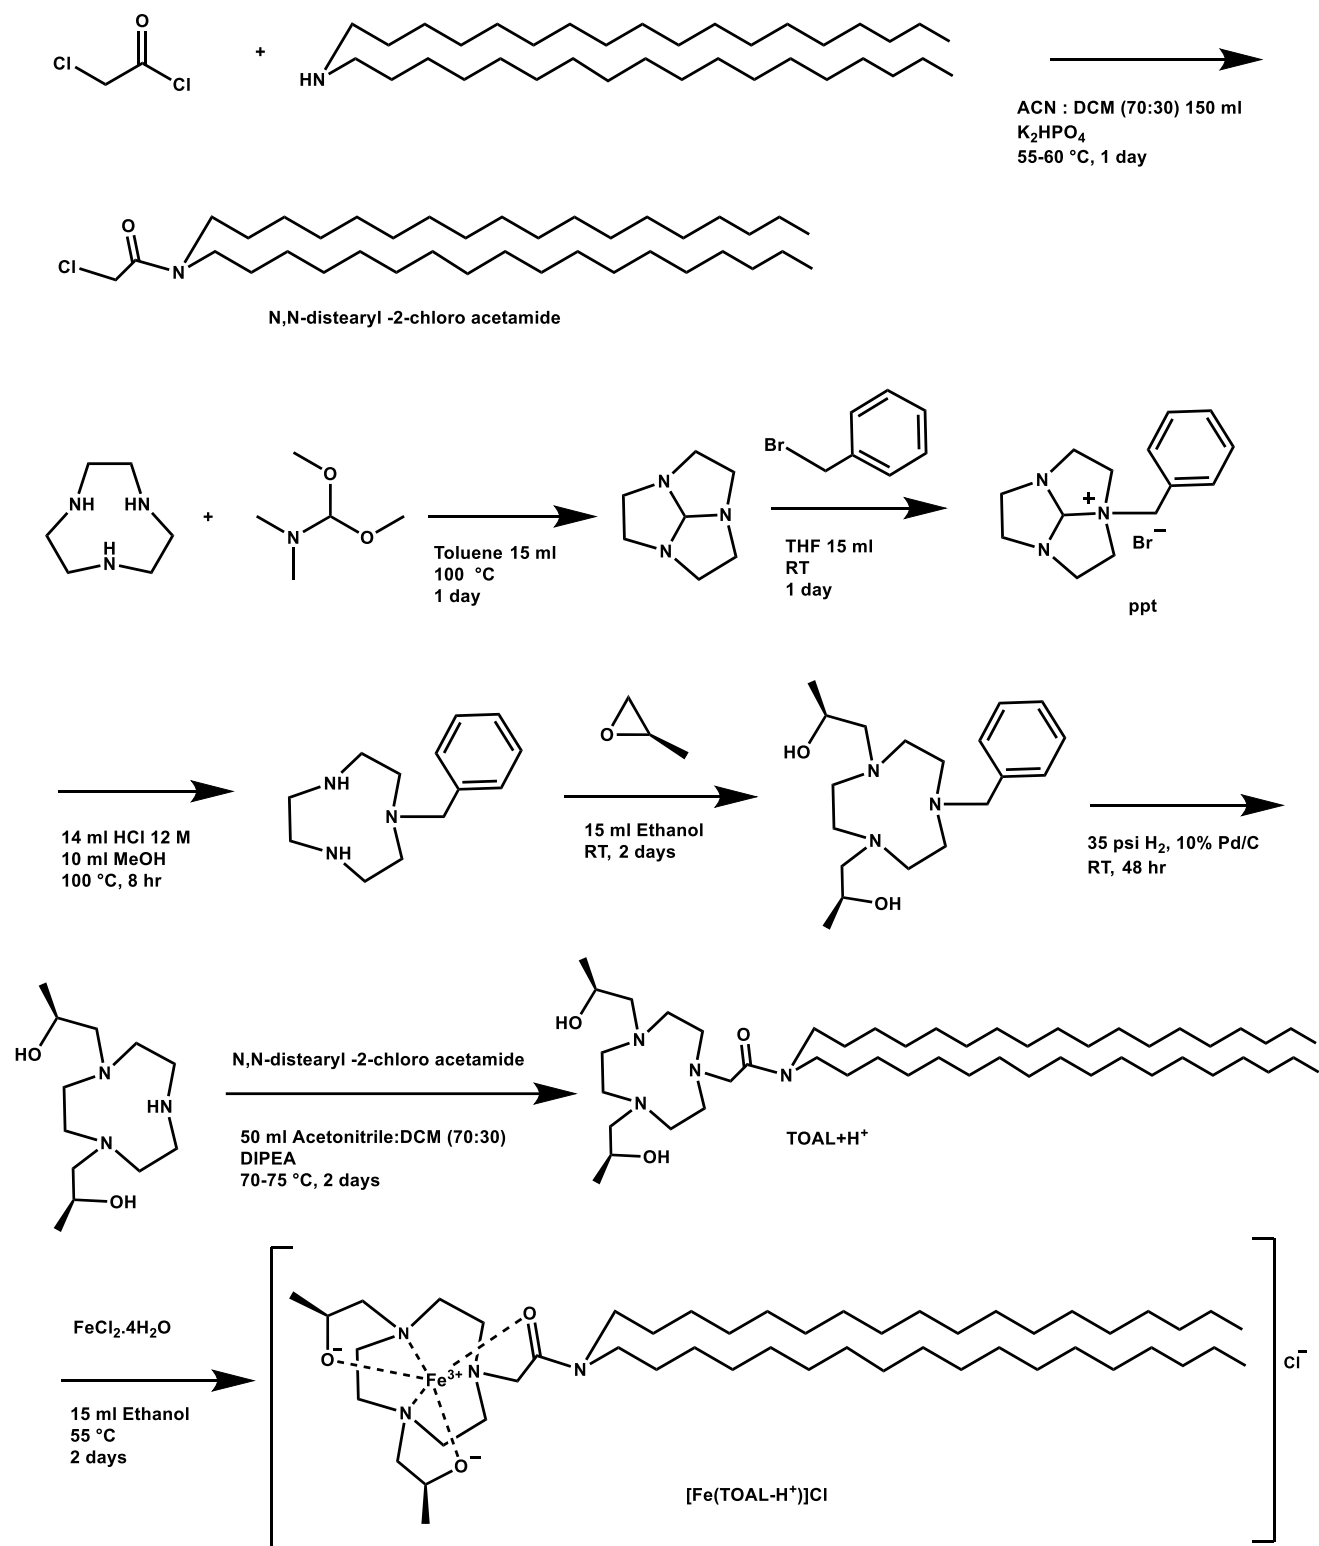

Scheme S1. Synthesis of N,N-distaeryl-2-chloro acetamide, TOAL+ H<sup>+</sup> ligand and Fe(III) complex

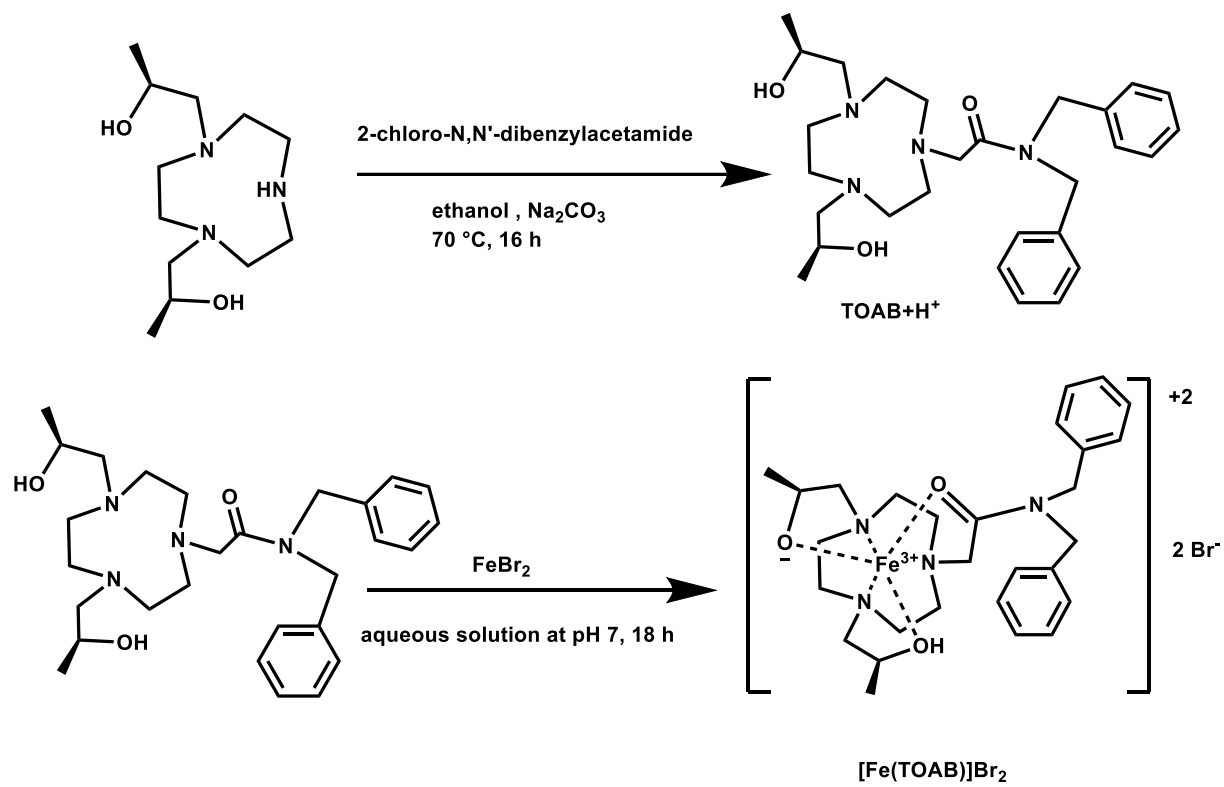

Scheme S2. Preparation of TOAB+H<sup>+</sup> ligand and Fe(III) complex

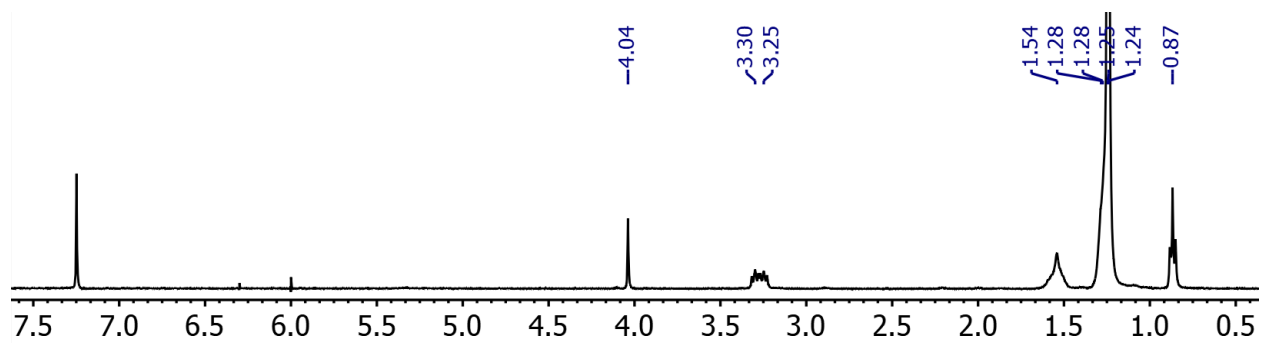

Figure S1a.  $^1\text{H}$  NMR of N,N-distaeryl-2-chloro acetamide in  $\text{CDCl}_3$

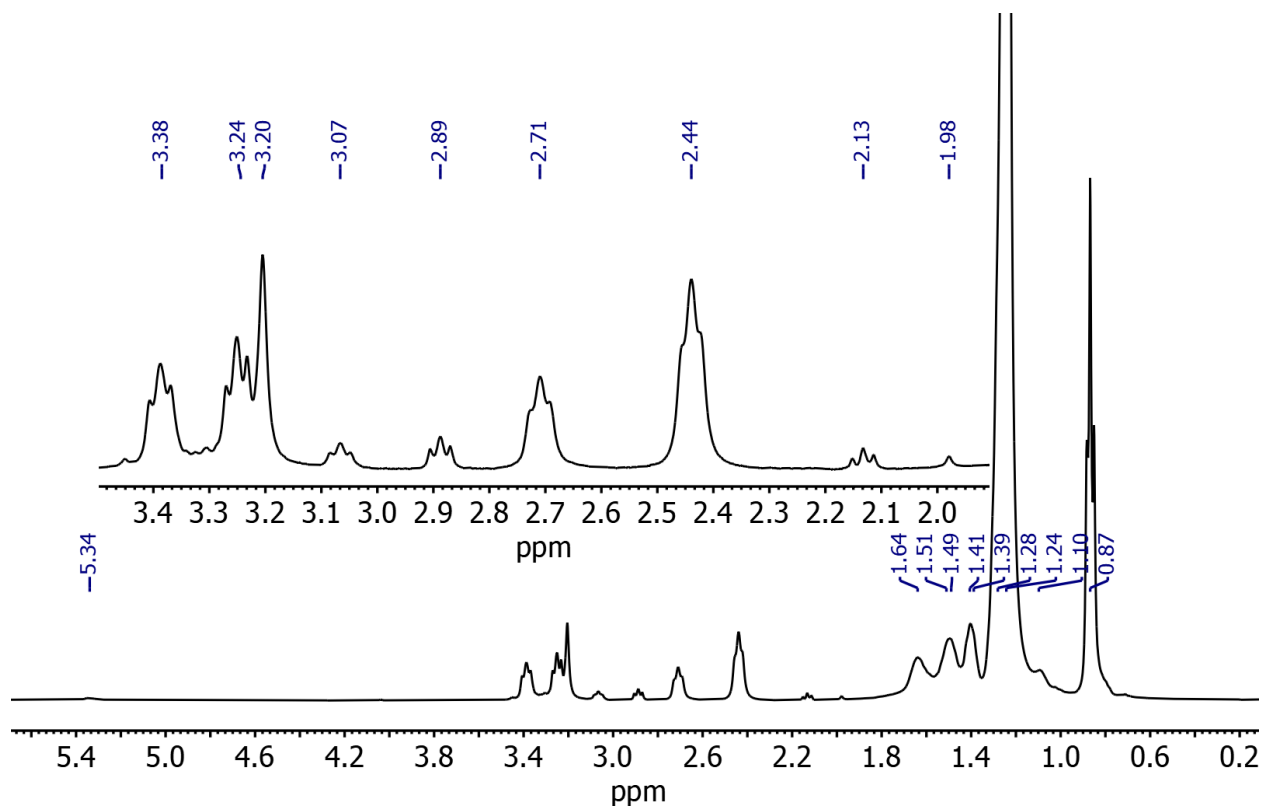

Figure S1b.  $^1\text{H}$  NMR of TOALH ligand in  $\text{CDCl}_3$

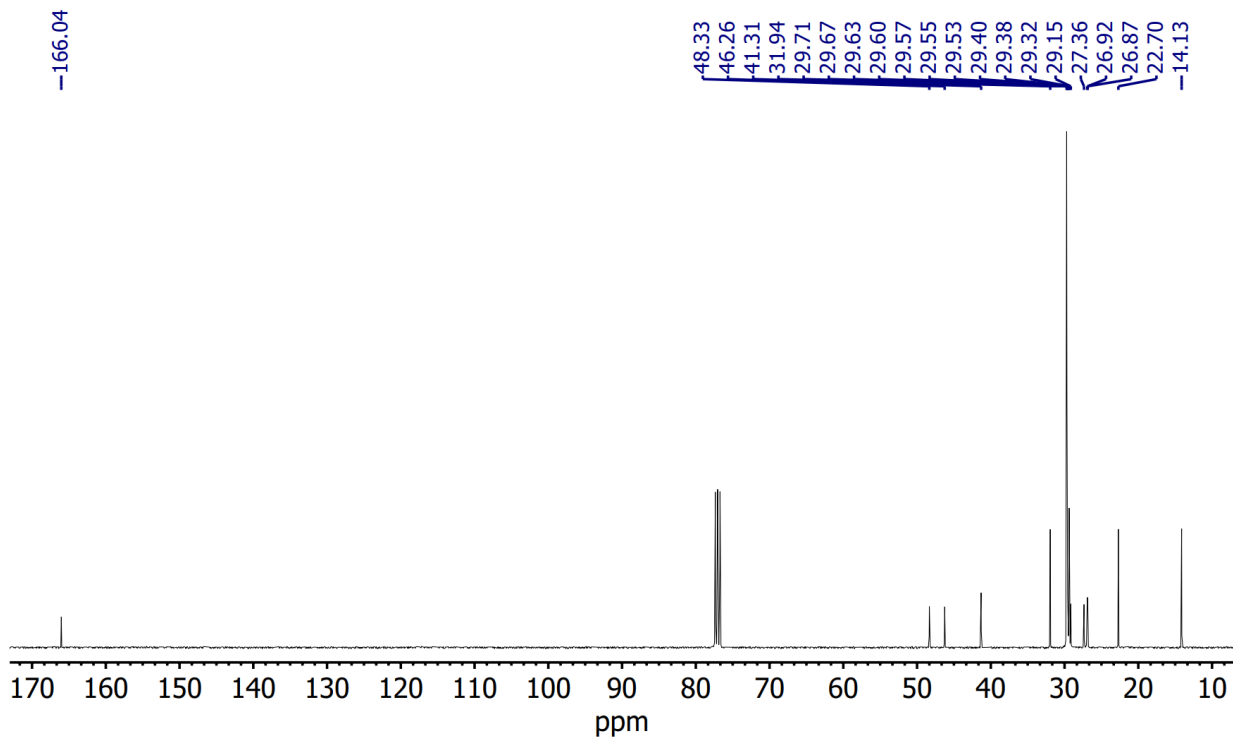

Figure S2a.  $^{13}\text{C}$  NMR of N,N-distaeryl-2-chloro acetamide in  $\text{CDCl}_3$

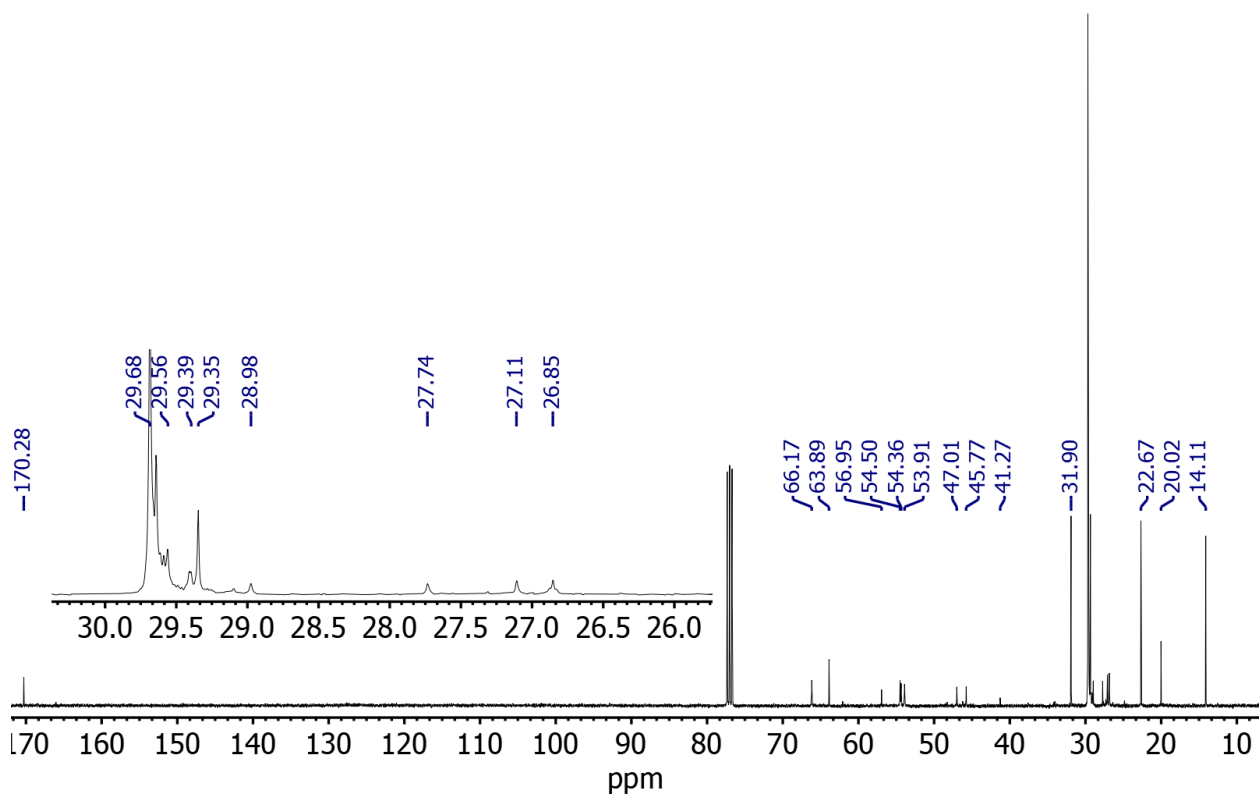

Figure S2b.  $^{13}\text{C}$  NMR of TOALH ligand in  $\text{CDCl}_3$

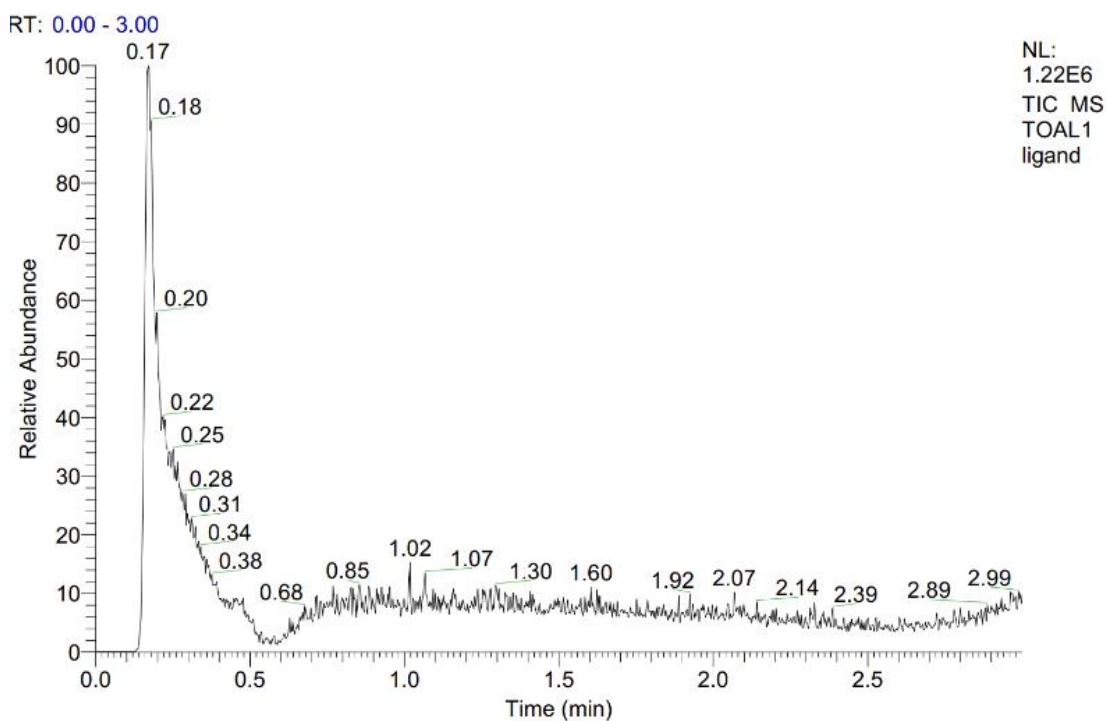

TOAL1 ligand #181-916 RT: 0.59-3.00 AV: 736 NL: 4.78E4  
T: ITMS + c ESI Full ms [100.00-2000.00]

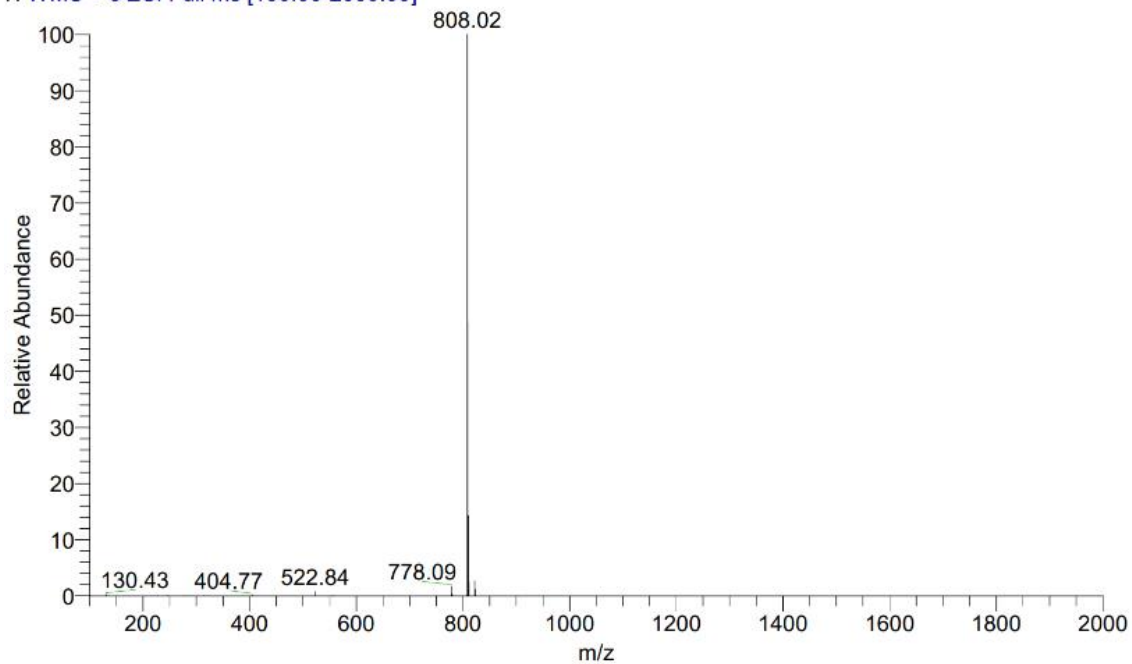

Figure S3. ESI-MS of TOALH ligand



RT: 0.00 - 3.00

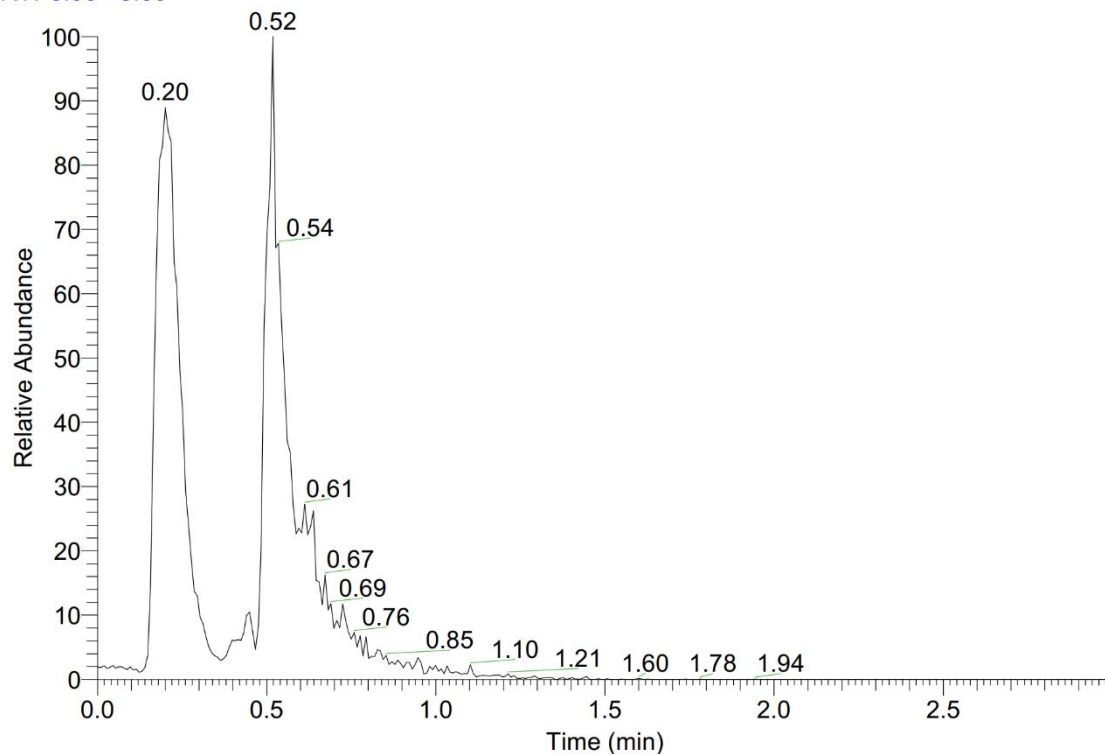

NL:  
8.71E5  
TIC MS  
Fe-TOAL1

Fe-TOAL1 #17-76 RT: 0.14-0.65 AV: 60 NL: 1.07E4

T: ITMS + p ESI E Full ms [100.00-2000.00]

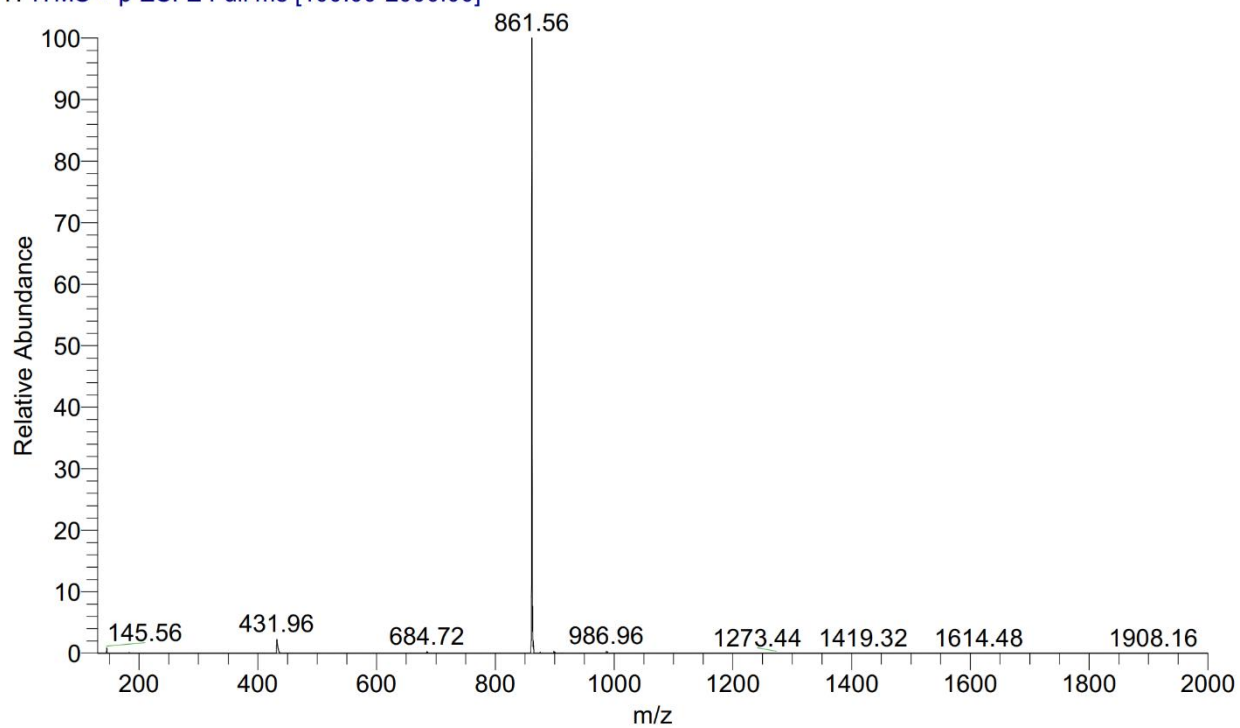

Figure S4. ESI-MS of  $[\text{Fe}(\text{TOAL-H}^+)]\text{Cl}$ .  $\text{M}^+ = [\text{Fe}(\text{TOAL-H}^+)]^+$

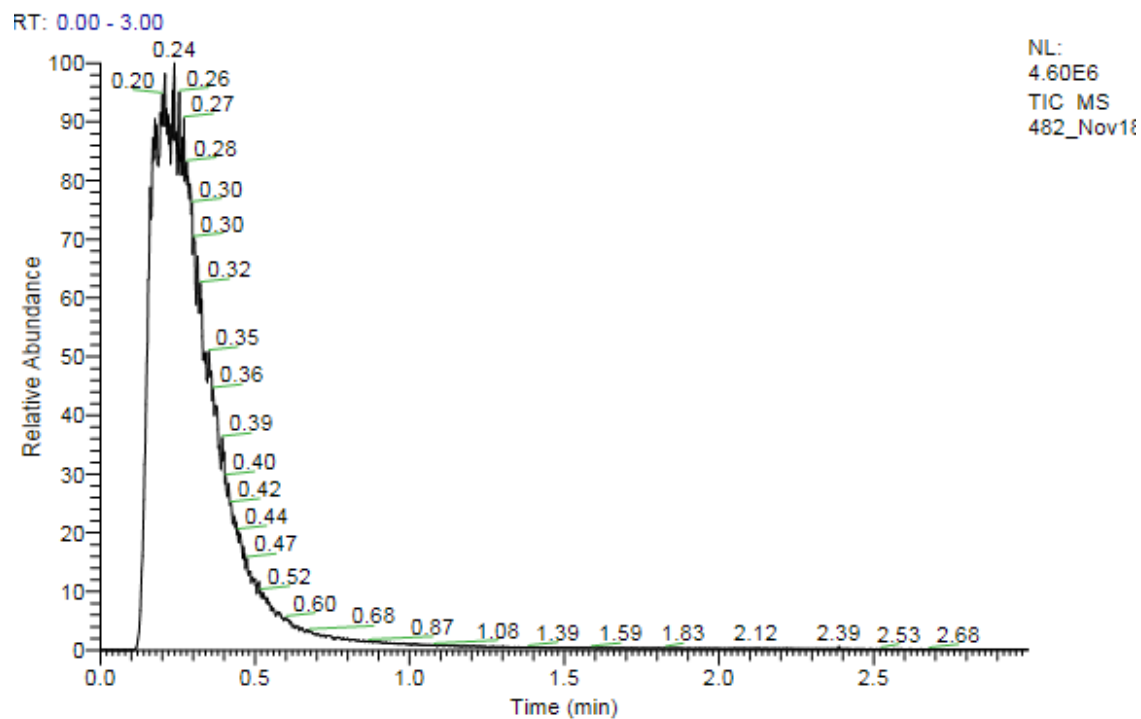

482\_Nov18 #58-206 RT: 0.13-0.46 AV: 149 NL: 2.79E5  
T: ITMS + p ESI Full ms [100.00-900.00]

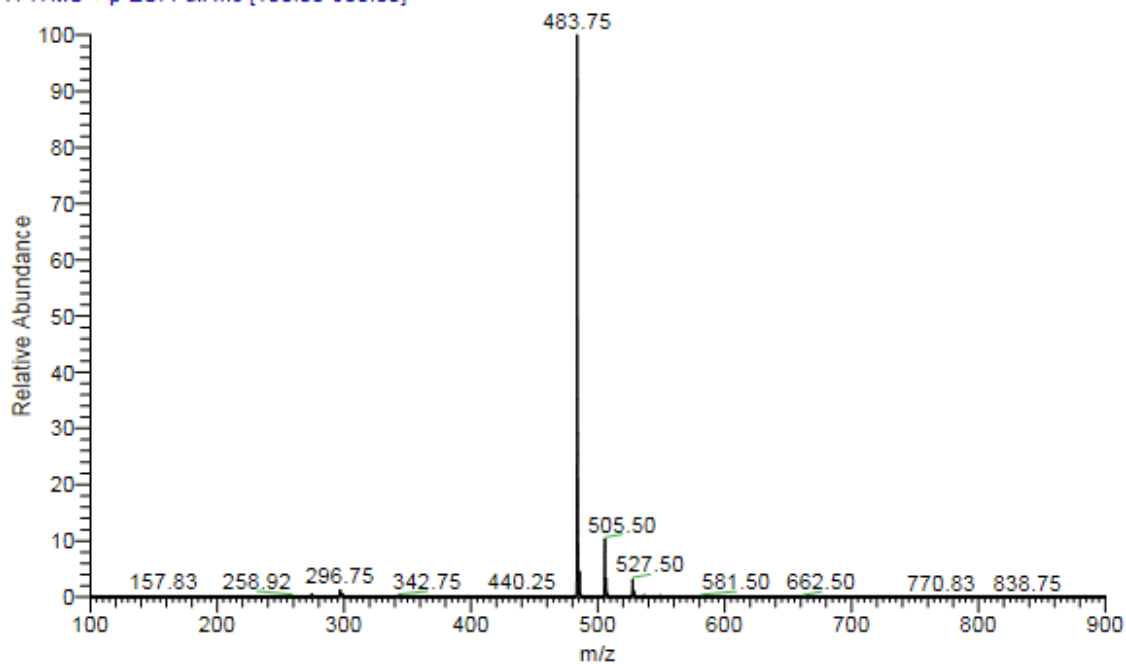

Figure S5. ESI-MS of TOABH (483.75). TOAB+Na<sup>+</sup> (505.50)

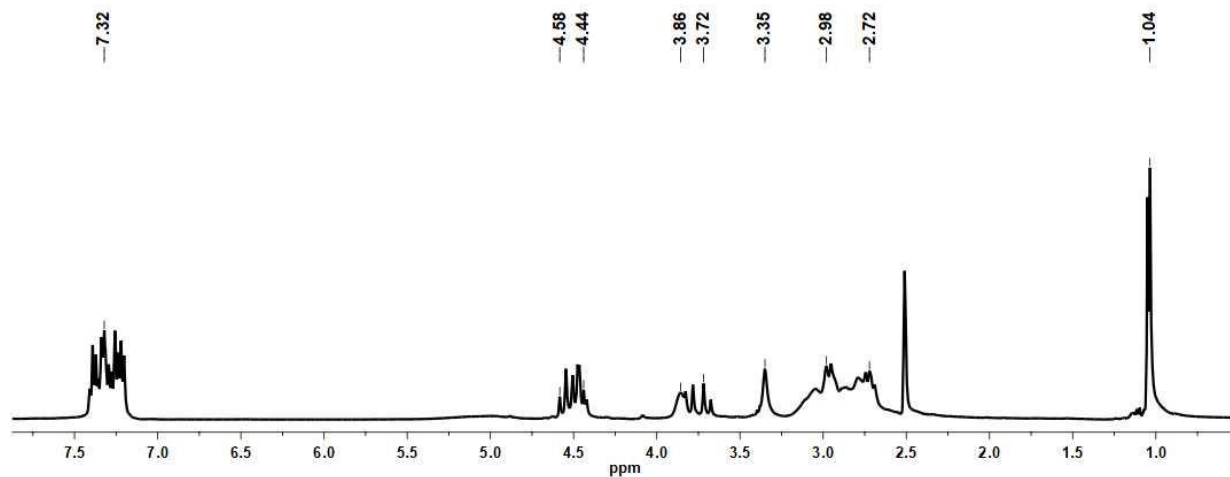

Figure S6.  $^1\text{H}$  NMR of TOABH ligand in  $\text{DMSO-D}_6$ .

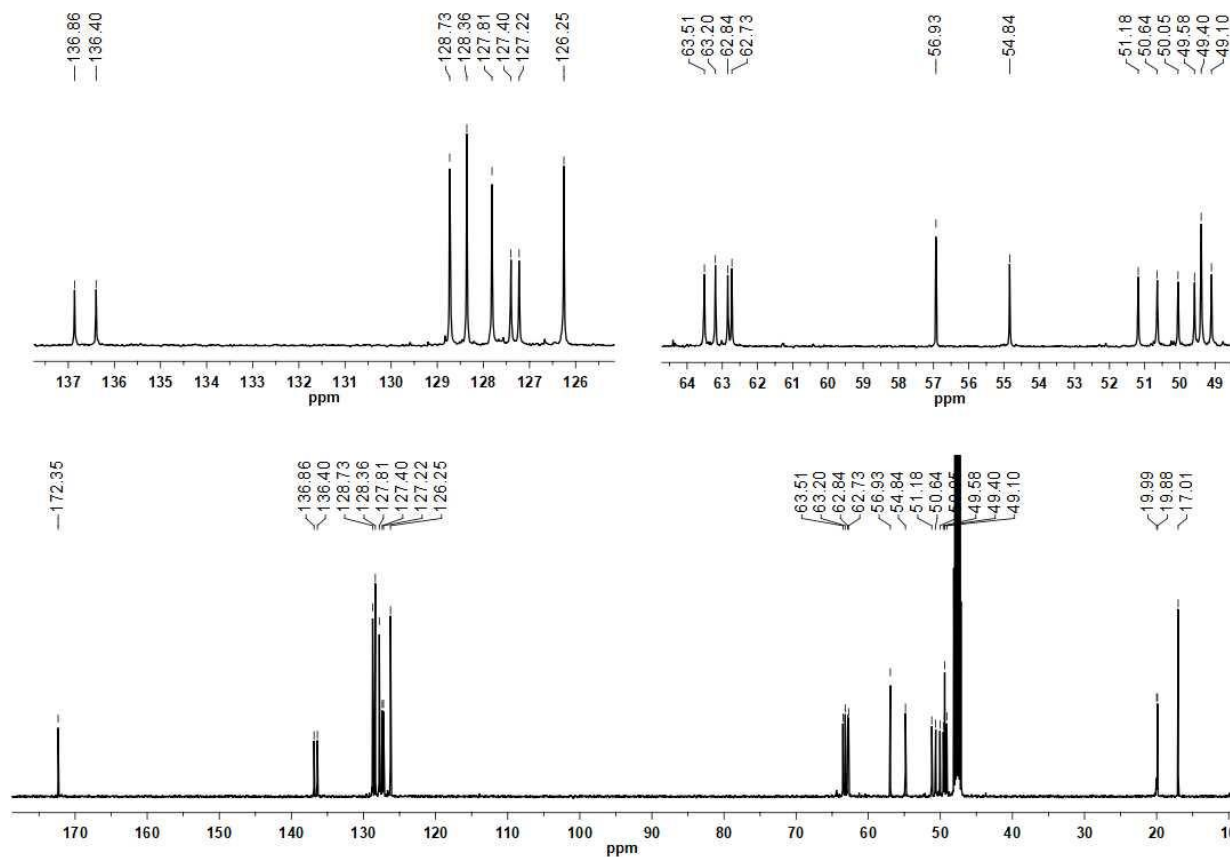

Figure S7.  $^{13}\text{C}$  NMR of TOABH ligand in MeOD

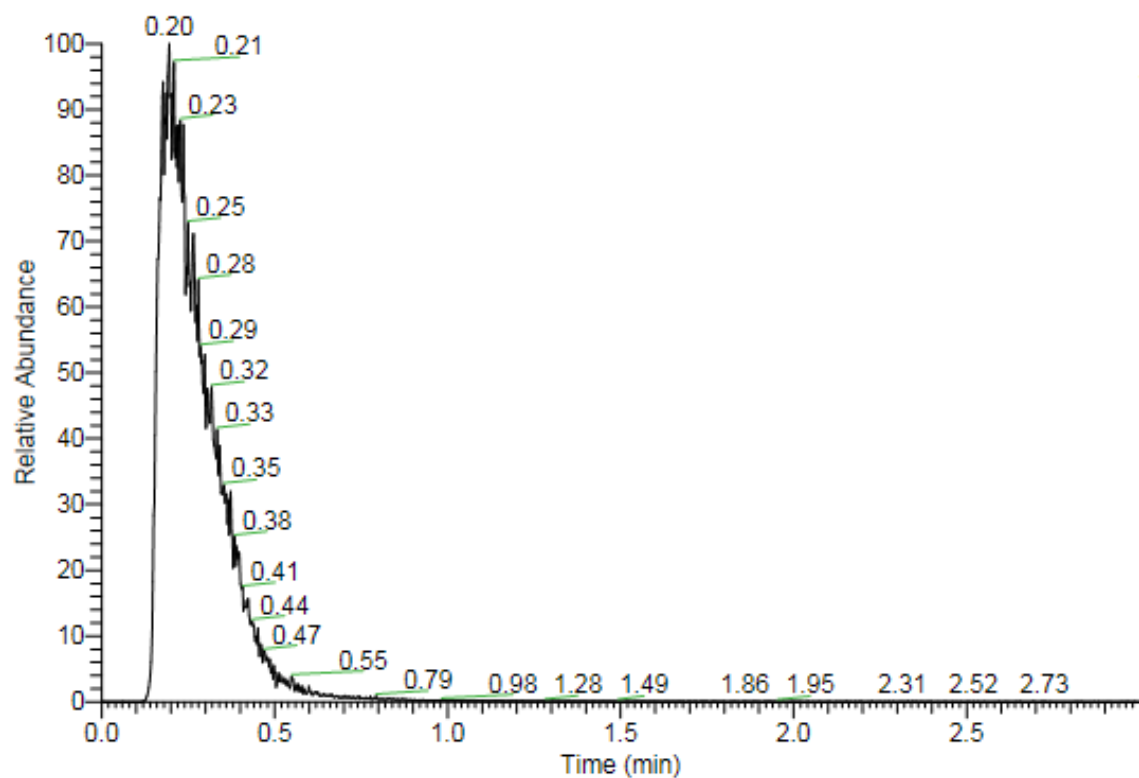

536\_3\_Nov9 #64-221 RT: 0.15-0.51 AV: 158 NL: 1.39E5  
 T: ITMS + p ESI Full ms [100.00-900.00]

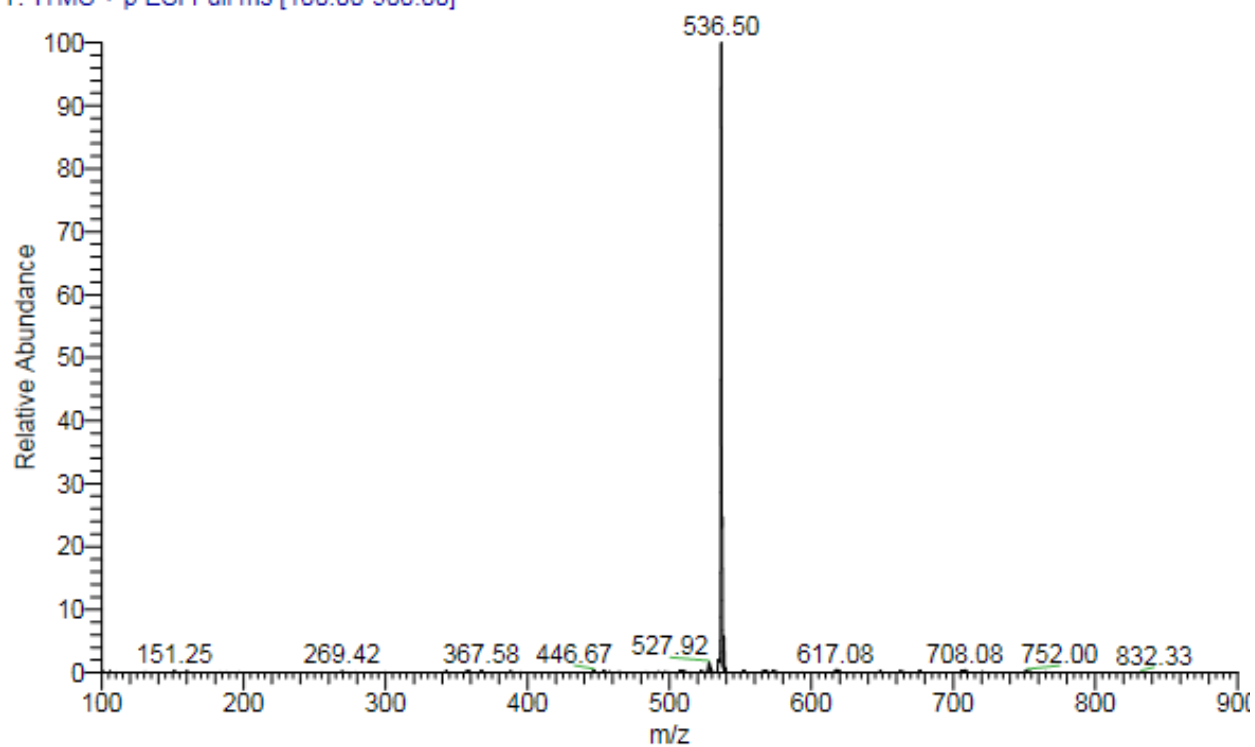

Figure S8. ESI-MS of  $[\text{Fe}(\text{TOAB})]\text{Br}_2$ .  $\text{M}^+ = [\text{Fe}(\text{TOAB}-\text{H}^+)]^+$

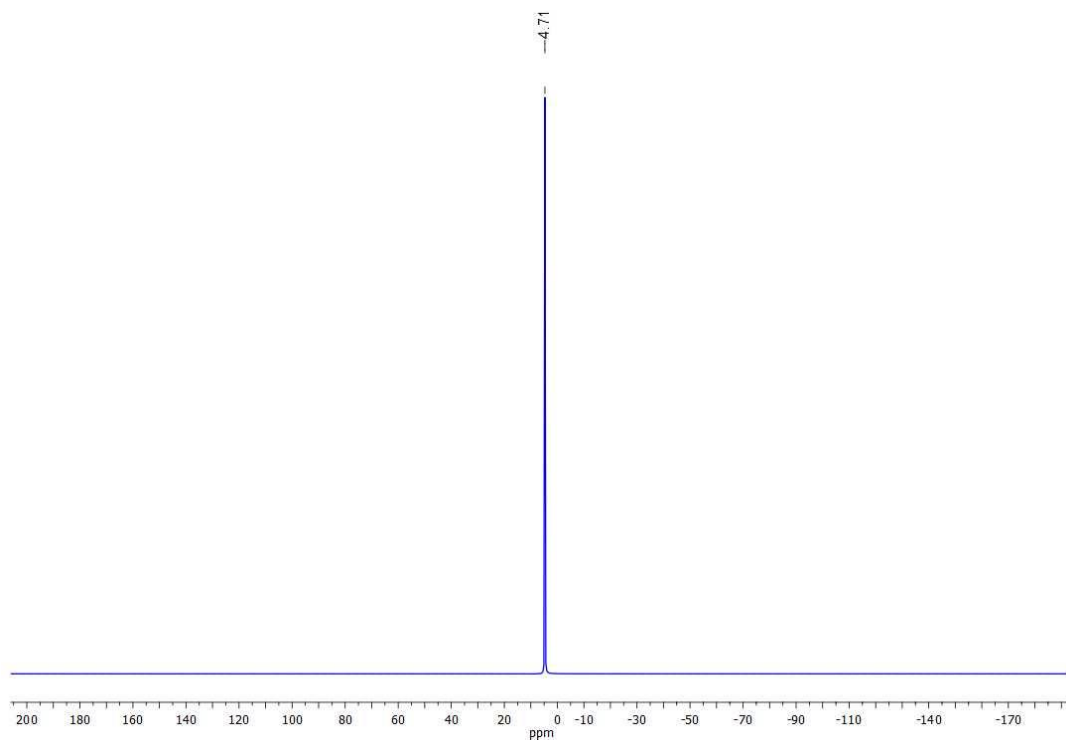

Figure S9.  $^1\text{H}$  Spectrum of  $[\text{Fe}(\text{TOAB})]\text{Br}_2$  at 15.0 mM (500 MHz,  $\text{D}_2\text{O}$ , 298K)

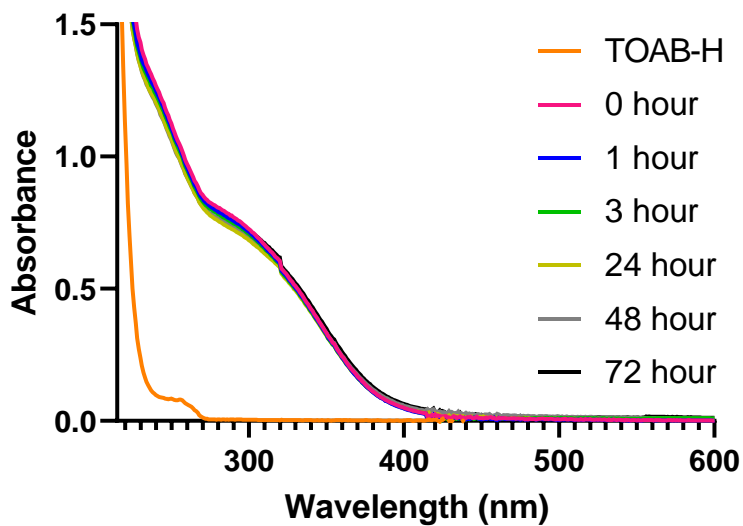

Figure S10. UV-Vis absorbance spectra of TOAB-H ligand and  $[\text{Fe}(\text{TOAB})]\text{Br}_2$ ; TOAB-H solution contained 0.20 mM ligand. Fe solution contained 0.20 mM  $[\text{Fe}(\text{TOAB})]\text{Br}_2$  in 1x PBS Buffer (pH 7.1) and was incubated at 37 °C for 72 hours

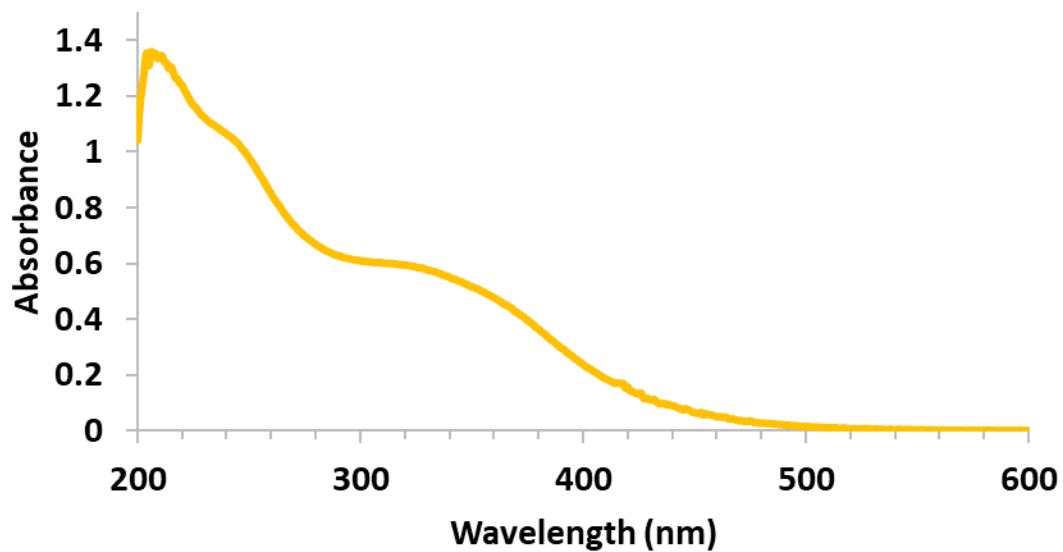

Figure S11. UV-Vis absorbance spectra of 145  $\mu\text{M}$   $[\text{Fe}(\text{TOAL-H}^+)]\text{Cl}$  in methanol at 37  $^\circ\text{C}$

| Complex                                 | Wavelength<br>(nm) | Molar absorptivity<br>( $\text{M}^{-1}\text{cm}^{-1}$ ) |
|-----------------------------------------|--------------------|---------------------------------------------------------|
| $[\text{Fe}(\text{TOAB})]\text{Br}_2$   | 300                | $3.83 \times 10^3$                                      |
| $[\text{Fe}(\text{TOAL-H}^+)]\text{Cl}$ | 206                | $9.40 \times 10^3$                                      |
|                                         | 247                | $6.98 \times 10^3$                                      |
|                                         | 332                | $3.97 \times 10^3$                                      |

Table S1. Molar absorptivity ( $\text{M}^{-1}\text{cm}^{-1}$ ) of the complexes at 37  $^\circ\text{C}$

|              | Time  | R <sub>1</sub> (s <sup>-1</sup> ) saline | R <sub>2</sub> (s <sup>-1</sup> ) saline | R <sub>1</sub> (s <sup>-1</sup> ) serum | R <sub>2</sub> (s <sup>-1</sup> ) serum |
|--------------|-------|------------------------------------------|------------------------------------------|-----------------------------------------|-----------------------------------------|
| <b>LipoA</b> | 1 day | 0.67                                     | 4.9                                      | 0.65                                    | 2.6                                     |
|              | 2 day | 0.69                                     | 5.0                                      | 0.76                                    | 2.8                                     |
| <b>LipoC</b> | 1 day | 0.93                                     | 5.5                                      | 2.3                                     | 8.5                                     |
|              | 2 day | 0.88                                     | 5.5                                      | 2.8                                     | 8.0                                     |
| <b>LipoB</b> | 1 day | 2.8                                      | 20                                       | 2.1                                     | 9.7                                     |
|              | 2 day | 2.8                                      | 19                                       | 2.0                                     | 12                                      |

Table S2. Relaxivity of liposomes over time measured at 37 °C, pH 7.4 and 9.4 T.

(Stored at 4 °C)

| <b>AGENT</b> | <b>r<sub>1</sub> (mM<sup>-1</sup>s<sup>-1</sup>)</b> | <b>r<sub>2</sub> (mM<sup>-1</sup>s<sup>-1</sup>)</b> | <b>r<sub>1</sub> (mM<sup>-1</sup>s<sup>-1</sup>)</b> | <b>r<sub>2</sub> (mM<sup>-1</sup>s<sup>-1</sup>)</b> |
|--------------|------------------------------------------------------|------------------------------------------------------|------------------------------------------------------|------------------------------------------------------|
|              | <b>1.4 T</b>                                         | <b>1.4 T</b>                                         | <b>9.4 T</b>                                         | <b>9.4 T</b>                                         |
| <b>LipoA</b> | 1.67 × 10 <sup>3</sup>                               | 2.28 × 10 <sup>3</sup>                               | 1.7 × 10 <sup>3</sup>                                | 1.3 × 10 <sup>4</sup>                                |
| <b>LipoB</b> | 2.6 × 10 <sup>4</sup>                                | 4.0 × 10 <sup>4</sup>                                | 2.8 × 10 <sup>4</sup>                                | 1.9 × 10 <sup>5</sup>                                |
| <b>LipoC</b> | 7.8 × 10 <sup>3</sup>                                | 2.3 × 10 <sup>4</sup>                                | 1.3 × 10 <sup>4</sup>                                | 7.3 × 10 <sup>4</sup>                                |

Table S3. r<sub>1</sub> and r<sub>2</sub> proton relaxivity values based on iron liposome (per-particle) concentration<sup>a</sup>

<sup>a</sup>Values are reported at 9.4 T (37 °C) and 1.4 T (34 °C), pH 6.8-7.2. The total lipid concentration was converted into liposome concentration by approximation of the number of lipid molecules in a liposome of 100 nm size. A plot of R<sub>1</sub> versus liposome concentration gave the per particle relaxivity.

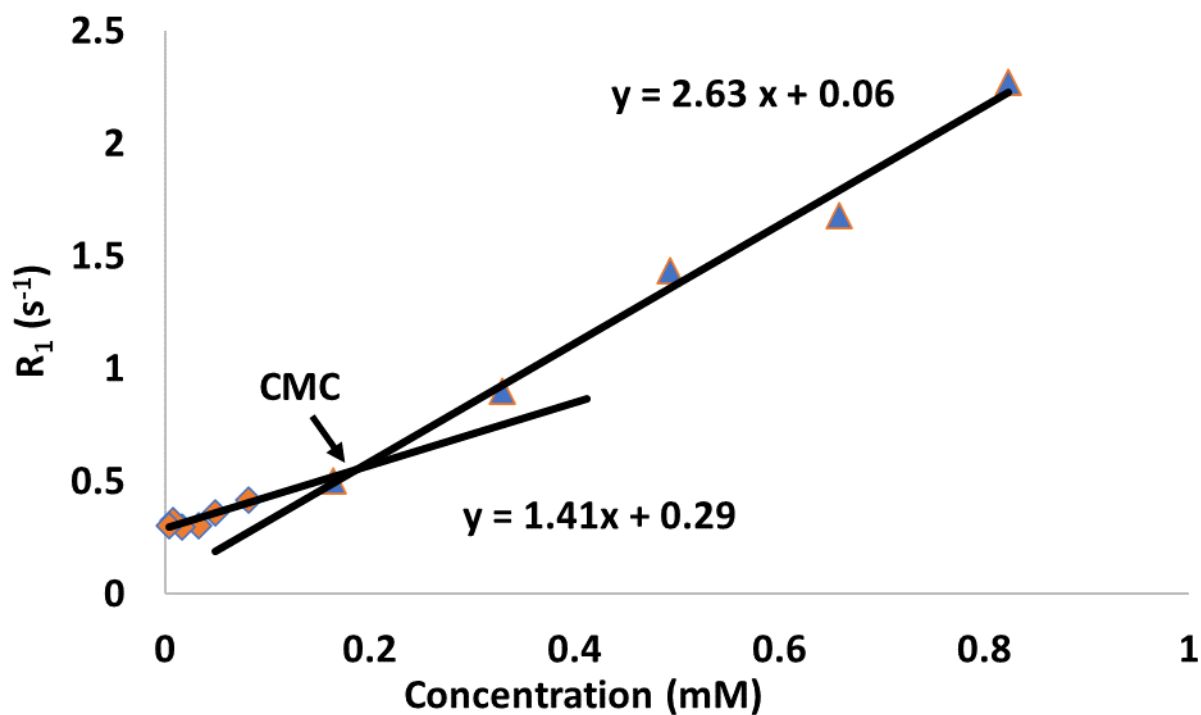

Figure S12. CMC determination for  $[Fe(TOAL)]^{2+}$  micelles at 1.4T and 34 °C.

A break at 0.19 mM concentration for  $[Fe(TOAL)]^{2+}$  micelle was observed indicating the presence of CMC.



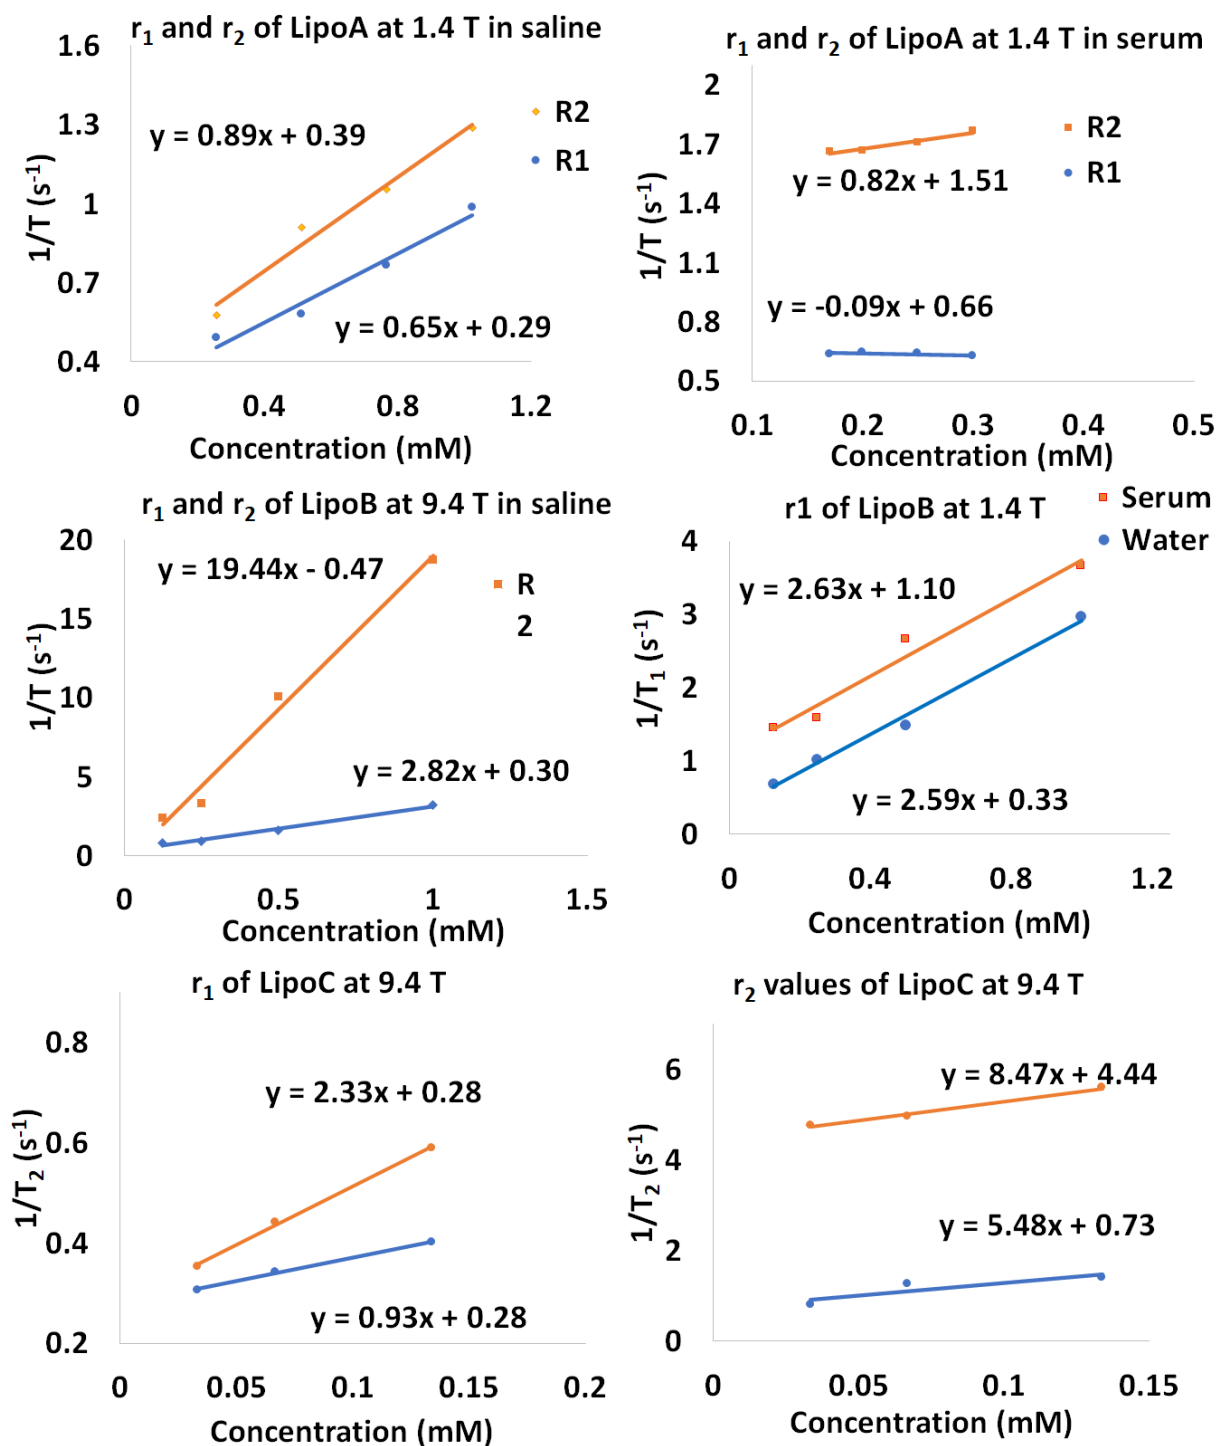

Figure S13. Sample  $r_1$  and  $r_2$  proton relaxivities of LipoA, LipoB and LipoC liposomes in aqueous/serum solutions at 1.4 T (34 °C) / 9.4 T (37 °C) as a function of liposome iron concentration. The relaxivities from the slopes are reported in Table 1. For the lower four graphs, orange is for experiments in serum and blue is in saline.

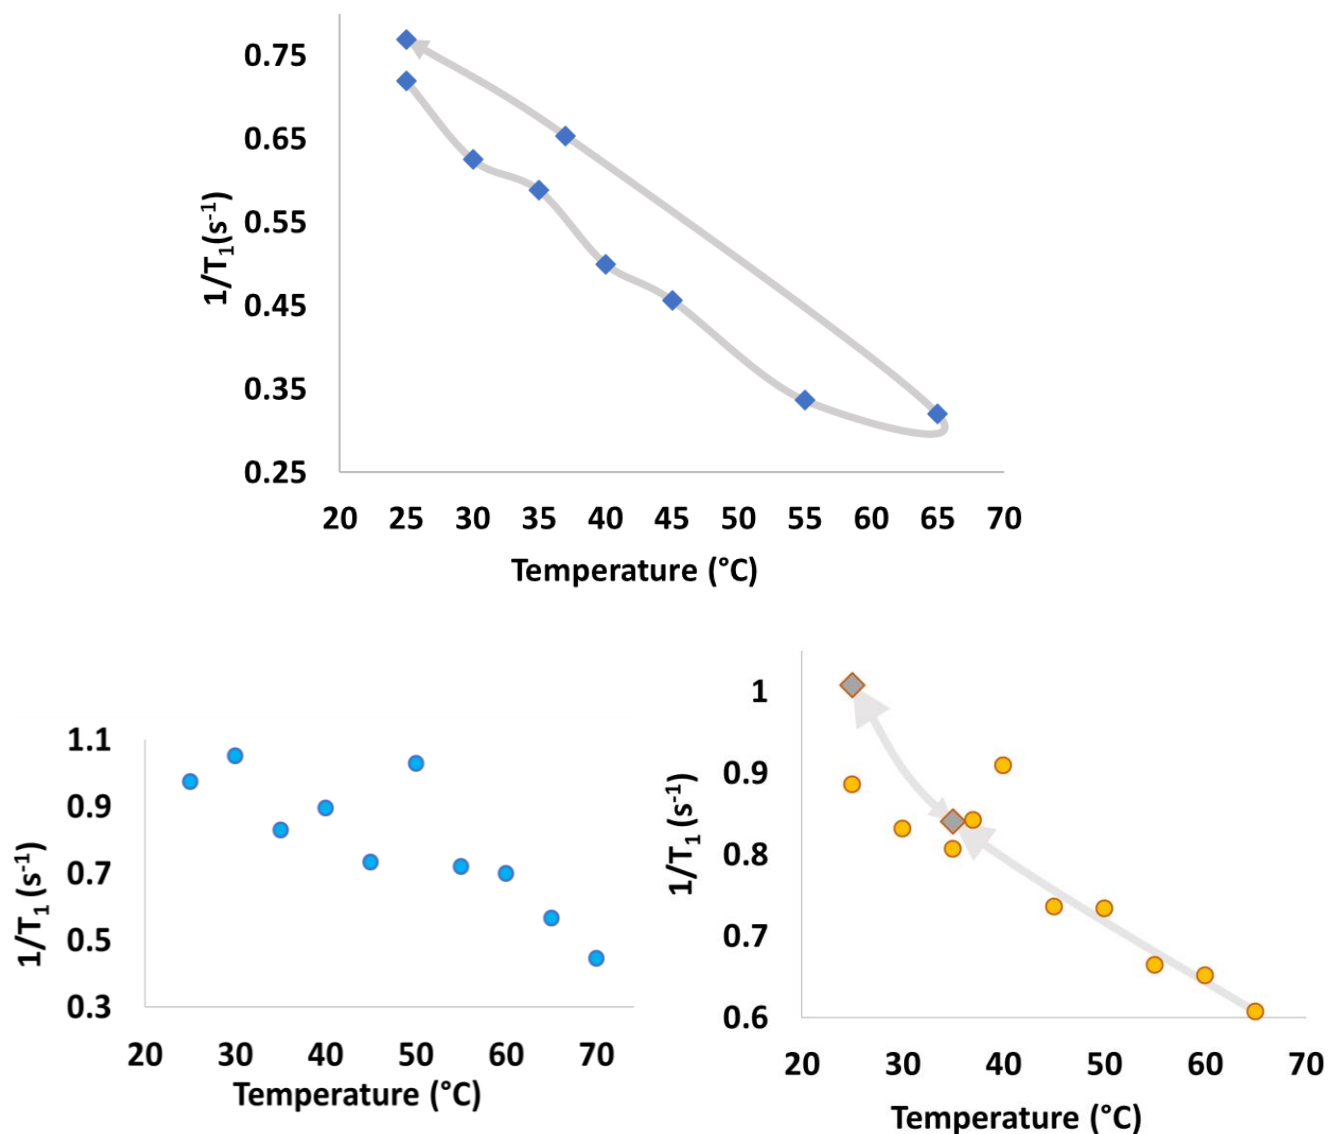

Figure S14.  $1/T_1$  dependence on temperature for LipoA (top), LipoB (left) and LipoC (right) sample; Temperature was increased at  $5^{\circ}C$  steps from 25  $^{\circ}C$  to 65-70  $^{\circ}C$  and then decreased to 25  $^{\circ}C$ . Each incubation was for 7 minutes. Lines are drawn to connect the sequential data points during cooling.

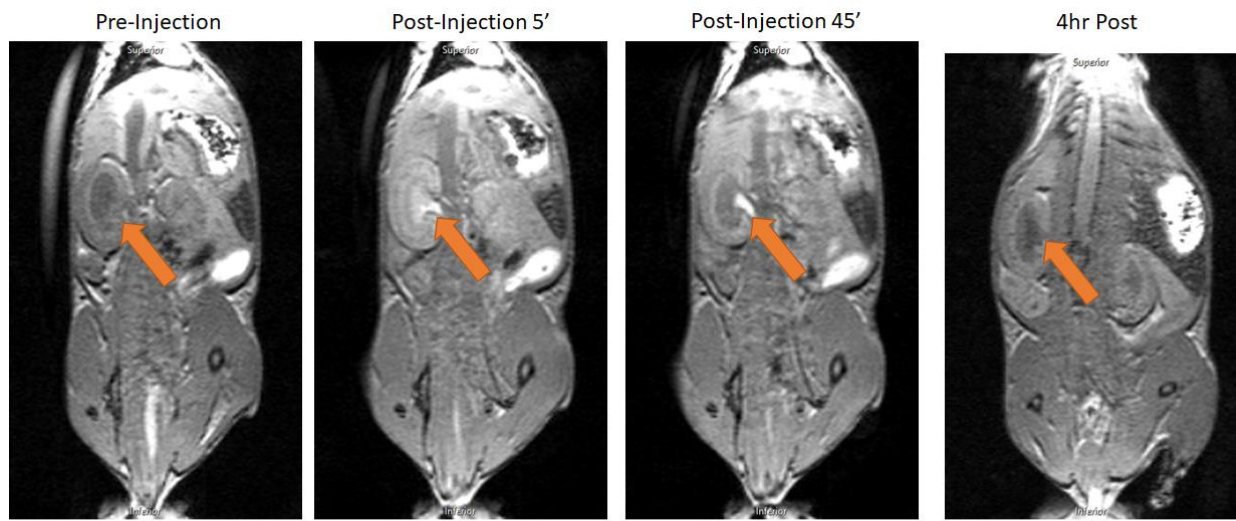

Arrow = Right Kidney

0 1500

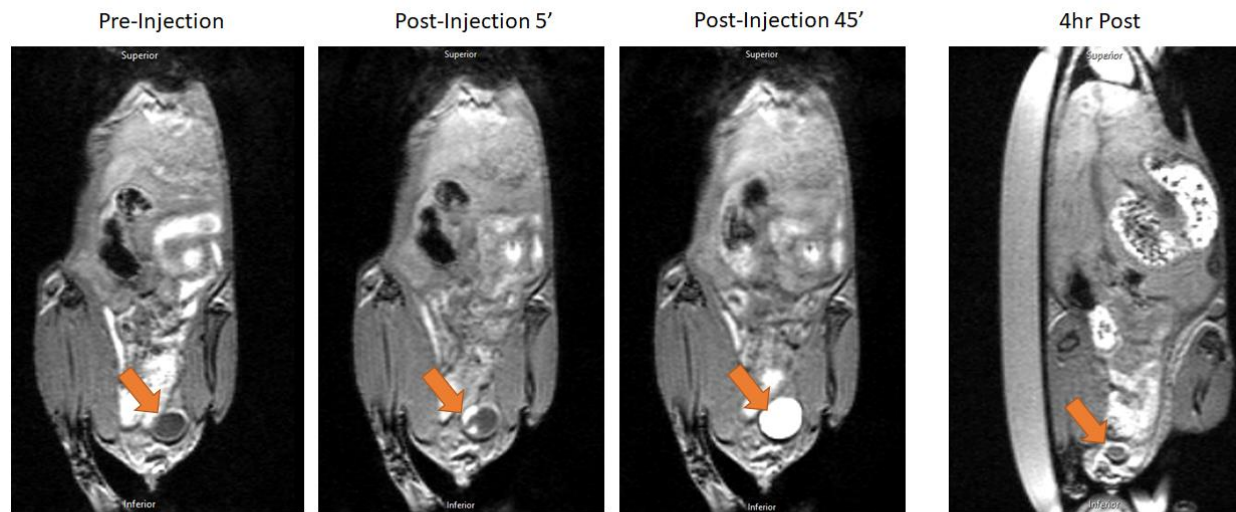

Arrow = Bladder

0 1500

Figure S15. Biodistribution and clearance of LipoA in a healthy BALB/c mouse; Dose was 50  $\mu\text{mol/kg}$  iron. Orange arrow shows Kidney (top) and bladder (bottom)

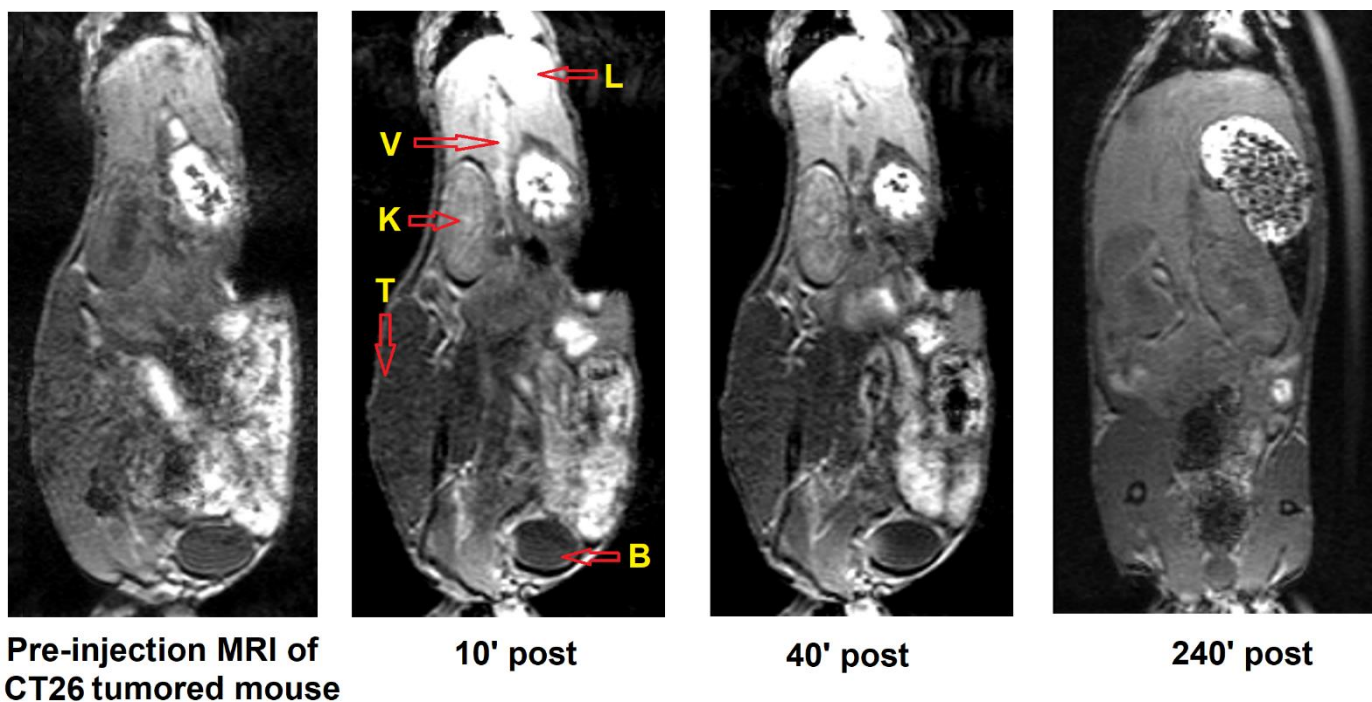

Figure S16. Biodistribution and clearance of LipoB in a CT26 tumored BALB/c mice; Dose was 50  $\mu\text{mol}$  iron per kg. Distribution to Tumor (T), Liver (L), Vena cava (V), Kidney (K) and Bladder (B) are highlighted in 10' post LipoB injection MRI.

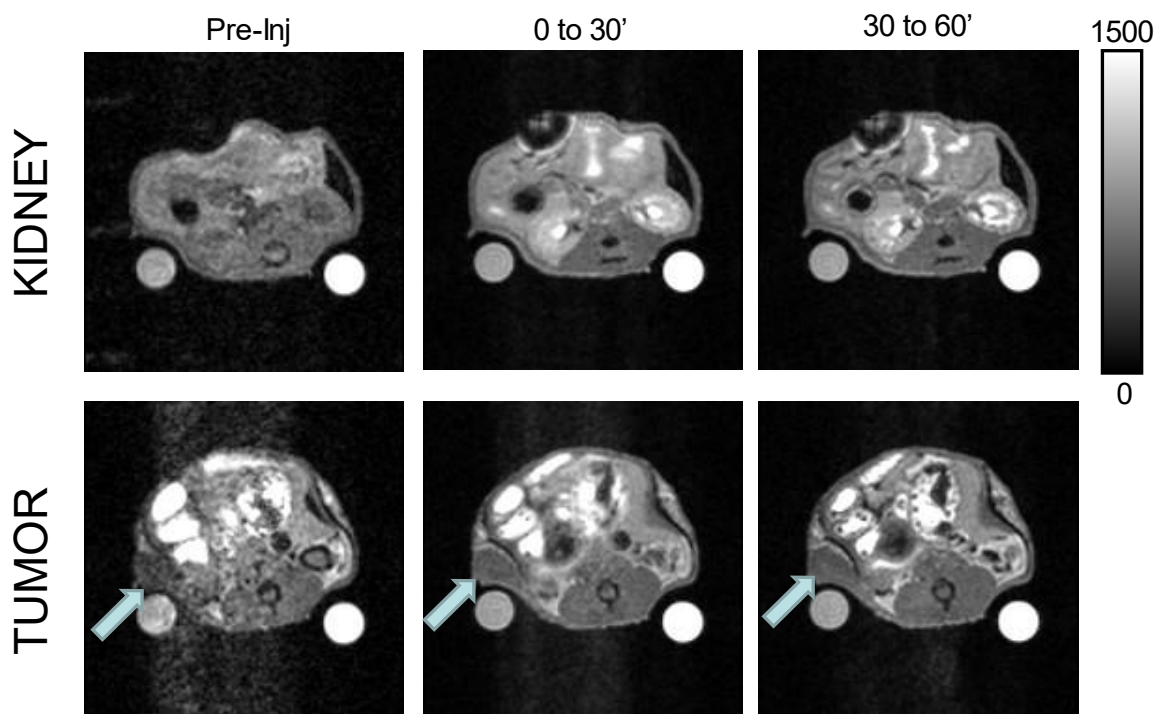

Figure S17. Biodistribution and clearance of LipoC in a CT26 tumored BALB/c mice; Dose- 100  $\mu\text{mol}$  Fe(III) per kg of mouse body weight.

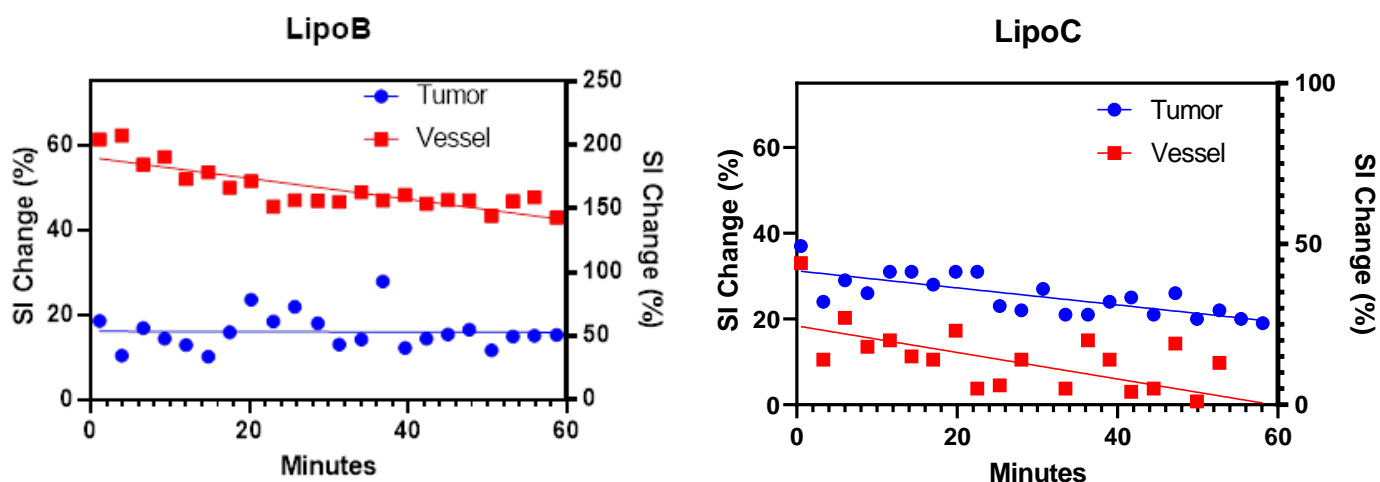

Figure S18. Change in  $T_1$ -weighted signal intensity for LipoB (50  $\mu\text{mol}$  [Fe] /kg) and LipoC (125  $\mu\text{mol}$  [Fe] /kg) in CT26 murine tumor over time compared to signal in blood vessel.

|                                                   | LipoA                | LipoB                | LipoC                |
|---------------------------------------------------|----------------------|----------------------|----------------------|
| Fe(III) CA Dose<br>( $\mu\text{mol}/\text{Kg}$ )  | 55.0                 | 50.0                 | 100                  |
| 1st order 'k'<br>( $\text{min}^{-1}$ )            | $6.7 \times 10^{-2}$ | $9.9 \times 10^{-3}$ | $3.4 \times 10^{-2}$ |
| $t_{1/2}$<br>(min)                                | 10.3                 | 70.0                 | 20.3                 |
| Ratio of $V_d$<br>2-3 min after injection<br>(ml) | 3.2                  | 1.2                  | 11                   |

Table S4. Dose, first order elimination rate constants, half-lives and volume of distribution ( $V_d$ ) ratio at 2-3 min after LipoA, LipoB and LipoC injections.  $V_d = \text{dose}/C_p$ ;  $V_d \propto \frac{\text{dose}}{\Delta\text{Signal}/R_{1,obs}}$ .  $R_{1,obs}$  of LipoA, LipoB and LipoC in serum were 0.60, 1.8 and 1.7 respectively for calculation at their administered concentration.

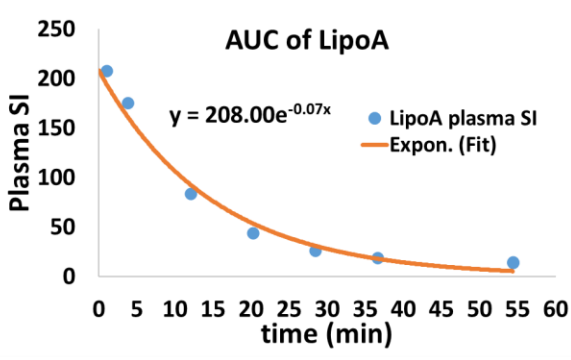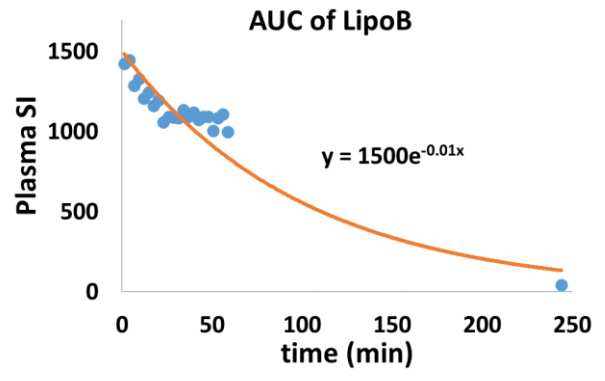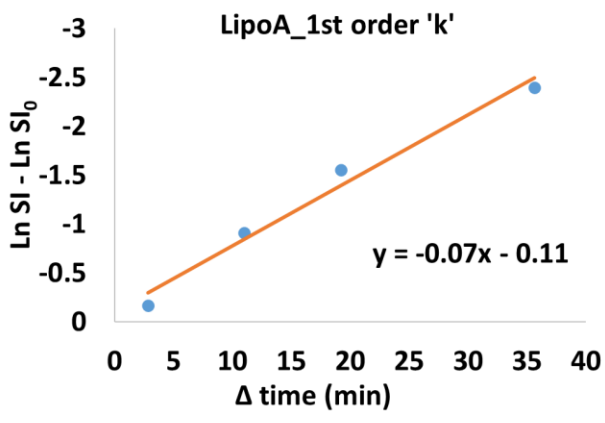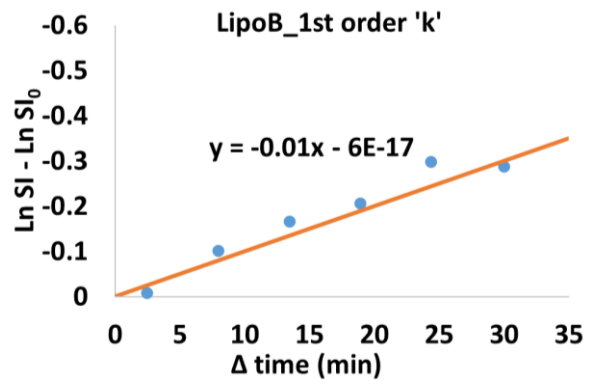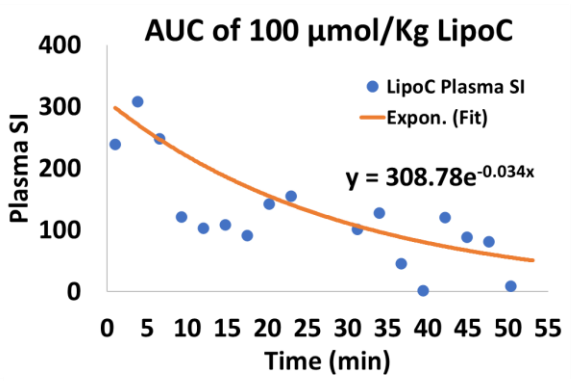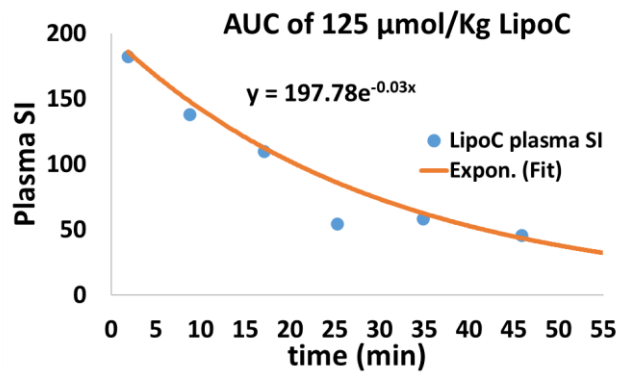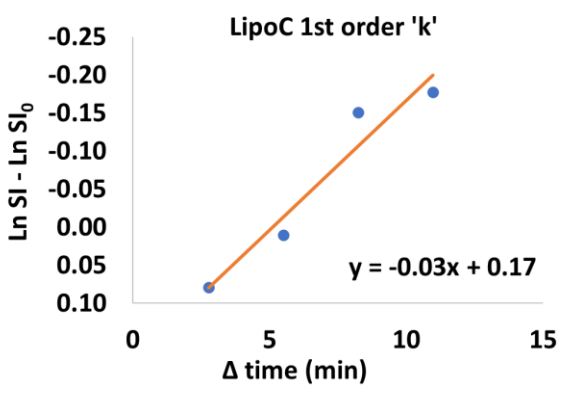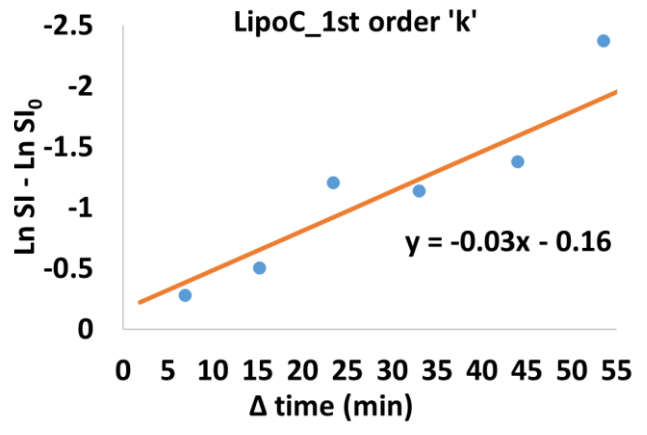

Figure S19. AUC graph and elimination rate constants of LipoA, LipoB and LipoC in Vena Cava

Temperature (°C): 25.0  
Count Rate (kcps): 207.5  
Cell Description: Disposable low volume cuvette (50µL)

Duration Used (s): 70  
Measurement Position (mm): 3.00  
Attenuator: 10

---

|                                | Size (d.nm):         | % Intensity: | St Dev (d.nm): |
|--------------------------------|----------------------|--------------|----------------|
| <b>Z-Average (d.nm):</b> 106.4 | <b>Peak 1:</b> 125.2 | 100.0        | 46.27          |
| <b>Pdl:</b> 0.148              | <b>Peak 2:</b> 0.000 | 0.0          | 0.000          |
| <b>Intercept:</b> 0.906        | <b>Peak 3:</b> 0.000 | 0.0          | 0.000          |

**Result quality :** Good

---

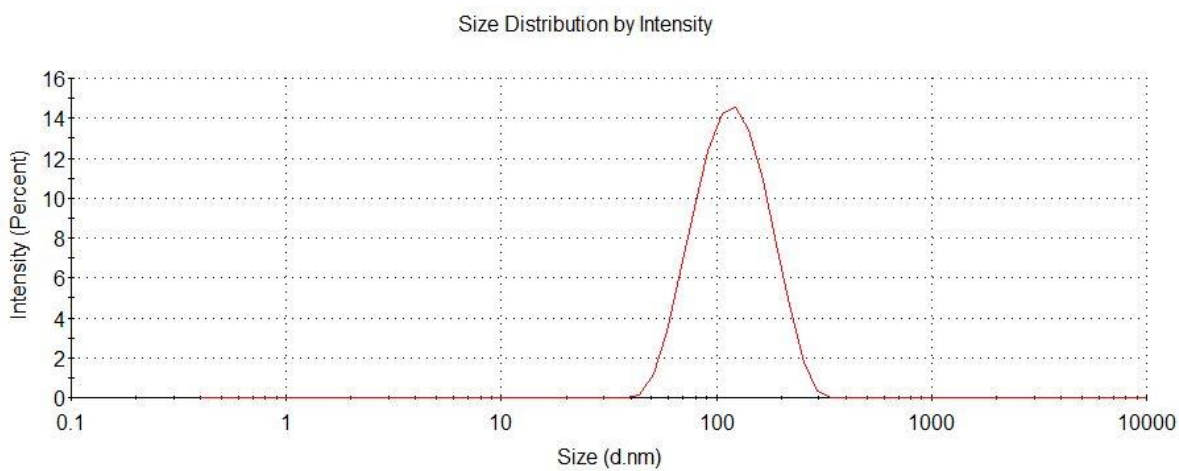

Figure S20a. DLS size measurement of dialyzed LipoA liposomes

Temperature (°C): 25.0  
Count Rate (kcps): 309.6  
Cell Description: Disposable low volume cuvette (50µL)

Duration Used (s): 60  
Measurement Position (mm): 3.00  
Attenuator: 9

---

|                                | Size (d.nm):         | % Intensity: | St Dev (d.nm): |
|--------------------------------|----------------------|--------------|----------------|
| <b>Z-Average (d.nm):</b> 107.3 | <b>Peak 1:</b> 125.0 | 100.0        | 58.28          |
| <b>Pdl:</b> 0.252              | <b>Peak 2:</b> 0.000 | 0.0          | 0.000          |
| <b>Intercept:</b> 0.896        | <b>Peak 3:</b> 0.000 | 0.0          | 0.000          |

**Result quality : Good**

---

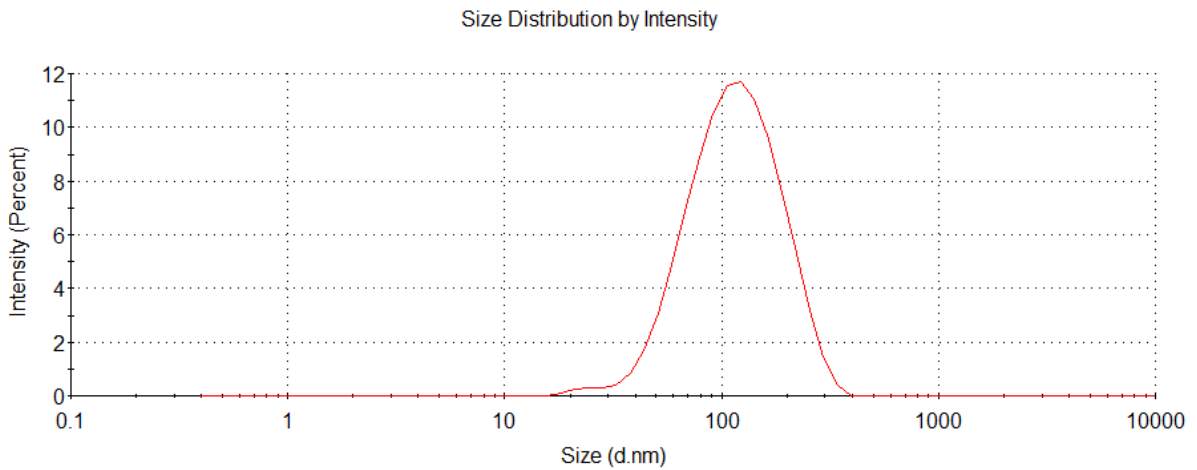

Figure S20b. DLS size measurement of dialyzed LipoB liposomes



|                                                               |                                        |
|---------------------------------------------------------------|----------------------------------------|
| <b>Temperature (°C):</b> 25.0                                 | <b>Duration Used (s):</b> 70           |
| <b>Count Rate (kcps):</b> 184.9                               | <b>Measurement Position (mm):</b> 3.00 |
| <b>Cell Description:</b> Disposable low volume cuvette (50µL) | <b>Attenuator:</b> 9                   |

|                                | <b>Size (d.nm):</b>  | <b>% Intensity:</b> | <b>St Dev (d.nm):</b> |
|--------------------------------|----------------------|---------------------|-----------------------|
| <b>Z-Average (d.nm):</b> 97.83 | <b>Peak 1:</b> 111.7 | 100.0               | 39.99                 |
| <b>Pdl:</b> 0.156              | <b>Peak 2:</b> 0.000 | 0.0                 | 0.000                 |
| <b>Intercept:</b> 0.901        | <b>Peak 3:</b> 0.000 | 0.0                 | 0.000                 |

**Result quality : Good**

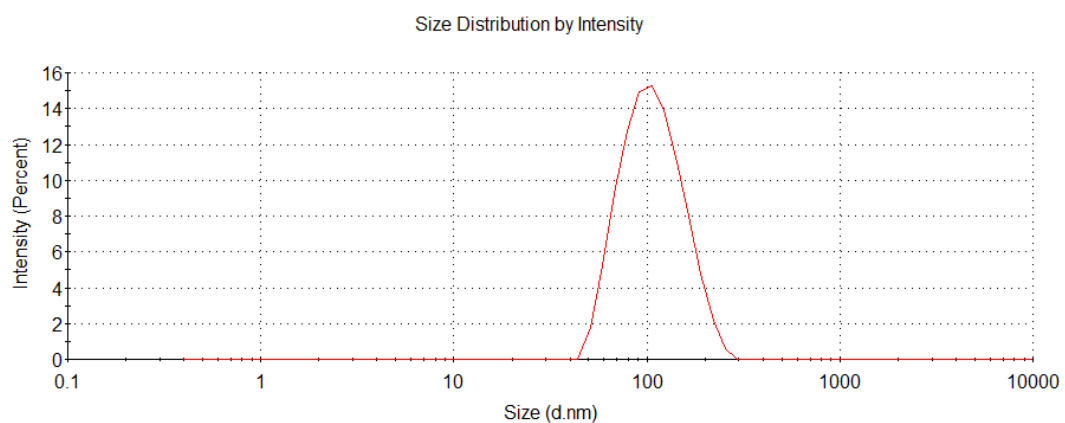

Figure S20c. DLS size measurement of dialyzed LipoC liposomes

**Sample Name:** FeToal\_micelle 1  
**SOP Name:** new mmsop.sop  
**File Name:** 2023\_03\_28\_Saiful.dts  
**Record Number:** 127  
**Material RI:** 1.59  
**Material Absorbtion:** 0.010  
**Dispersant Name:** Water  
**Dispersant RI:** 1.330  
**Viscosity (cP):** 0.8872  
**Measurement Date and Time:** Tuesday, April 4, 2023 5:29:50 P

**Temperature (°C):** 25.0  
**Count Rate (kcps):** 131.4  
**Cell Description:** Glass cuvette with square aperture  
**Duration Used (s):** 80  
**Measurement Position (mm):** 4.65  
**Attenuator:** 10

|                                | <b>Size (d.nm):</b>  | <b>% Volume:</b> | <b>St Dev (d.n...</b> |
|--------------------------------|----------------------|------------------|-----------------------|
| <b>Z-Average (d.nm):</b> 93.10 | <b>Peak 1:</b> 102.7 | 4.7              | 33.66                 |
| <b>Pdl:</b> 0.335              | <b>Peak 2:</b> 17.01 | 94.6             | 2.443                 |
| <b>Intercept:</b> 0.800        | <b>Peak 3:</b> 2418  | 0.6              | 336.3                 |

**Result quality :** Refer to quality report

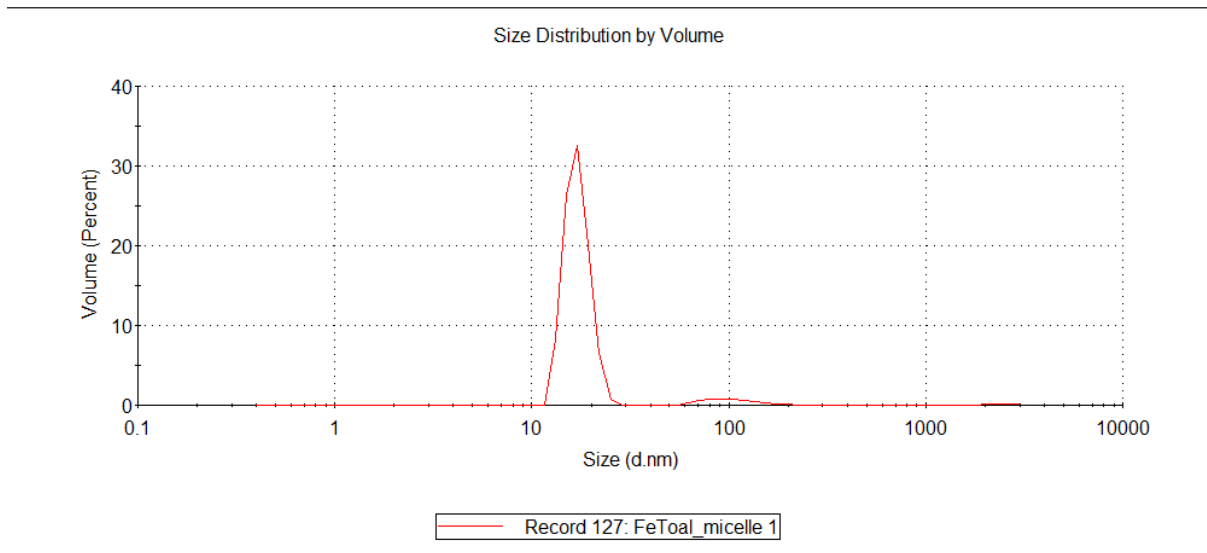

Figure 20d. DLS size measurement of FeTOAL micelle

$$\text{Total number of lipid per liposome, } N_{tot} = \frac{4 \times \pi \times (r - h)^2 + 4 \times \pi \times (r)^2}{\text{Lipid head group average surface area}}$$

Number of Liposomes,  $N_{Lipo}$

$$= \frac{\text{Liposome volume (L)} \times \text{Liposome concentration (M)} \times \text{Number of Avogadro}}{\text{Total number of lipid per liposome, } N_{tot}}$$

$$\text{Permeability, } P_w = \frac{1000 \times d^{inner} \times r_1^{overall} \times r_1^{inner} \times [CA]^{inner}}{6(r_1^{inner} - r_1^{overall})} \quad (1)$$

$$\text{Water residence time, } \tau = \frac{d^{inner}}{6 \times P_w} \quad (2)$$

$$r_{1, in} = \frac{f_{in}}{v_{in}} \times r_{1, CA} \quad (3)$$

$$r_{1, out} = (1 - f_{in}) \times r_{1, CA} \quad (4)$$

$$r_1 = r_{1, out} + \frac{v_{in}}{\frac{1}{r_{1, in}} + \tau} \quad (5)$$

The water permeability of the liposomal membranes was determined following a method described by Terreno and co-workers<sup>1</sup> and later used in another work by Peters et al<sup>2</sup>. The unencapsulated Fe(NOTP) was removed by dialysis for 24 - 48 h at 4°C . A value of  $11.5 \times 10^{-5}$  cm.s<sup>-1</sup> was found for LipoA for the  $P_w$ . The water residence time of LipoA was found 13.8 μs at 34 °C and 1.4 T.

For LipoA, LipoB and LipoC,  $v_{in} = 0.0297, 0.0319$  and  $0.0145$  were estimated from the volume and per mM concentration of [CA] in liposomes.

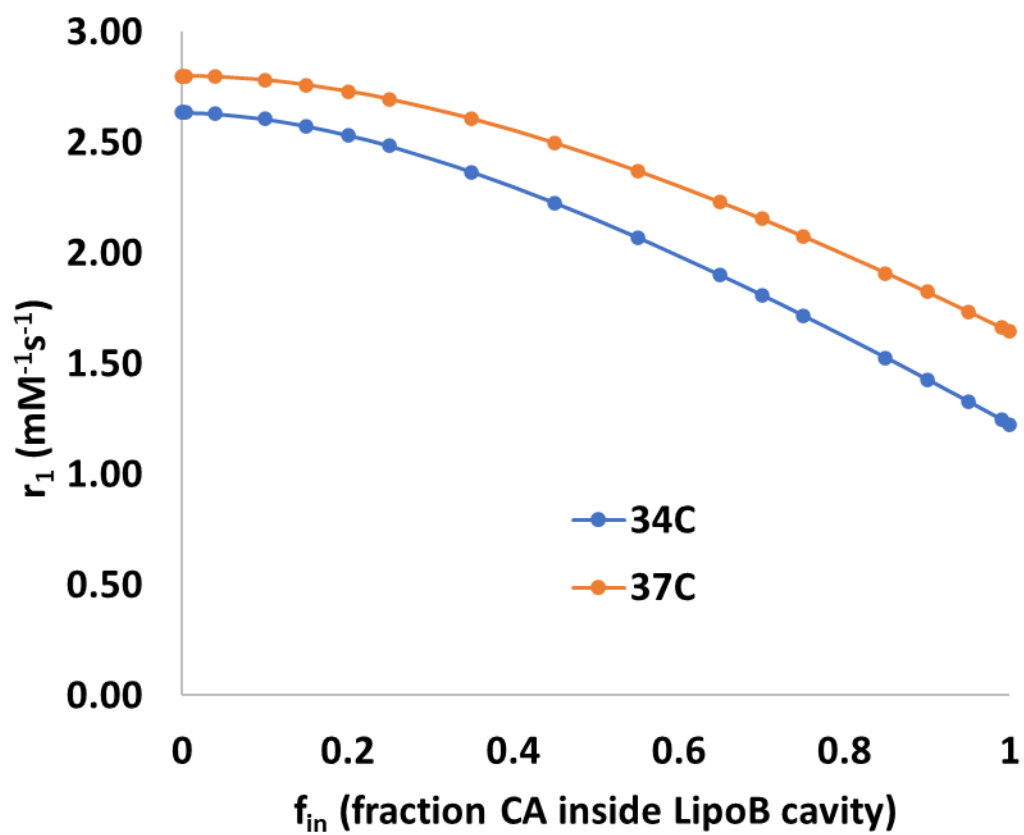

Figure 21. The relaxivity of LipoB as a function of the fraction of the contrast agent that are inside the liposomal core, as calculated with equations 3-5 at 34 °C, 1.4 T, 37 °C at 9.4 T.

## References

- (1) Terreno, E.; Sanino, A.; Carrera, C.; Castelli, D. D.; Giovenzana, G. B.; Lombardi, A.; Mazzon, R.; Milone, L.; Visigalli, M.; Aime, S. Determination of water permeability of paramagnetic liposomes of interest in MRI field. *J. Inorg. Biochem.* **2008**, *102*, 1112-1119.
- (2) Schühle, D. T.; van Rijn, P.; Laurent, S.; Vander Elst, L.; Muller, R. N.; Stuart, M. C. A.; Schatz, J.; Peters, J. A. Liposomes with conjugates of a calix[4]arene and a Gd-DOTA derivative on the outside surface; an efficient potential contrast agent for MRI. *Chem Commun* **2010**, *46*, 4399-4401.
